# Supplementary material for: The Diversity of Chemoprotective Glucosinolates in Moringaceae (Moringa spp.)
Source: PubMed Central journal article supplement (PMC5964242; doi:10.1038/s41598-018-26058-4), 2018-05-22
Supplement: 41598_2018_26058_MOESM1_ESM.pdf [file 41598_2018_26058_MOESM1_ESM.pdf]

## **The Diversity of Chemoprotective Glucosinolates in Moringaceae (*Moringa* spp.)**

Jed W. Fahey,\* Mark E. Olson, Katherine K. Stephenson, Kristina L. Wade, Gwen M. Chodur, David Odee, Wasif Nouman, Michael Massiah, Jesse Alt, Patricia A. Egner, Walter C. Hubbard

\*Corresponding author: Dr. Jed William Fahey (jfahey@jhmi.edu), Director, Cullman Chemoprotection Center, 855 N. Wolfe St., Suite 625, Baltimore, Maryland, USA 21205.

## Supplemental Data

**NMR.** Both accurate mass and NMR assignments of 4-(-L-glucopyranosyloxy)benzyl glucosinolate (4GBGS) were consistent with compound **3** (**Fig. 1**), which has not previously been reported. Briefly, NMR connectivities and assignments of the non-exchangeable protons were accomplished using 2D COSY data (see **Supplemental Fig. S1**). The benzyl protons are identified by a doublet (d) at 7.17 belonging to the proton closer to the ester oxygen and a doublet of doublets (dd) at 6.86 ppm. The two sugar moieties are distinguished by their C1-protons, which for the glucosyl group comes at 5.46 and for the pyranosyloxy (the sugar adjacent to the sulfur atom) comes at 6.94 ppm. For compound **3**, the pyranosyloxy C2, C3, C4, C5 and C6 protons are assigned at 3.86, 3.3, 3.72, 1.06 and 2.78 ppm, respectively. The C2, C3, C4, C5 and C6 protons of the glucosyl moiety are 4.03, 3.86, 3.2, 3.0 and 3.42 ppm, respectively. The observation that the two sugar moieties can be distinguished by the distinct chemical shifts of the C1 protons confirms the identity of compound **3**. The  $^{13}\text{C}$  chemical shifts are consistent with the expected values for the various types of carbon atoms. Compound **4** was identified using a similar approach.

**Supplemental Figure S1.** Proton and carbon NMR obtained using a 400 MHz Mercury spectrometer, with one dimensional  $^1\text{H}$ ,  $^{13}\text{C}$  natural abundance, and two-dimensional  $^1\text{H}$ - $^1\text{H}$  COSY of glucosoonjnain (4-(L-glucopyranosyloxy)benzyl glucosinolate or 4GBGS).

504

Archive directory: /space/home/admin1/vnmrsys/data  
Sample directory: admin1\_23Feb2006  
File: PROTON

Pulse Sequence: s2pu1  
Solvent: D2O  
Ambient temperature  
Mercury-400BB "mercury400"

Relax. delay 1.000 sec  
Pulse 45.0 degrees  
Acq. time 1.999 sec  
Width 3194.9 Hz  
8 repetitions  
OBSERVE H1, 399.7578831 MHz  
DATA PROCESSING  
FT size 16384  
Total time 0 min, 25 sec

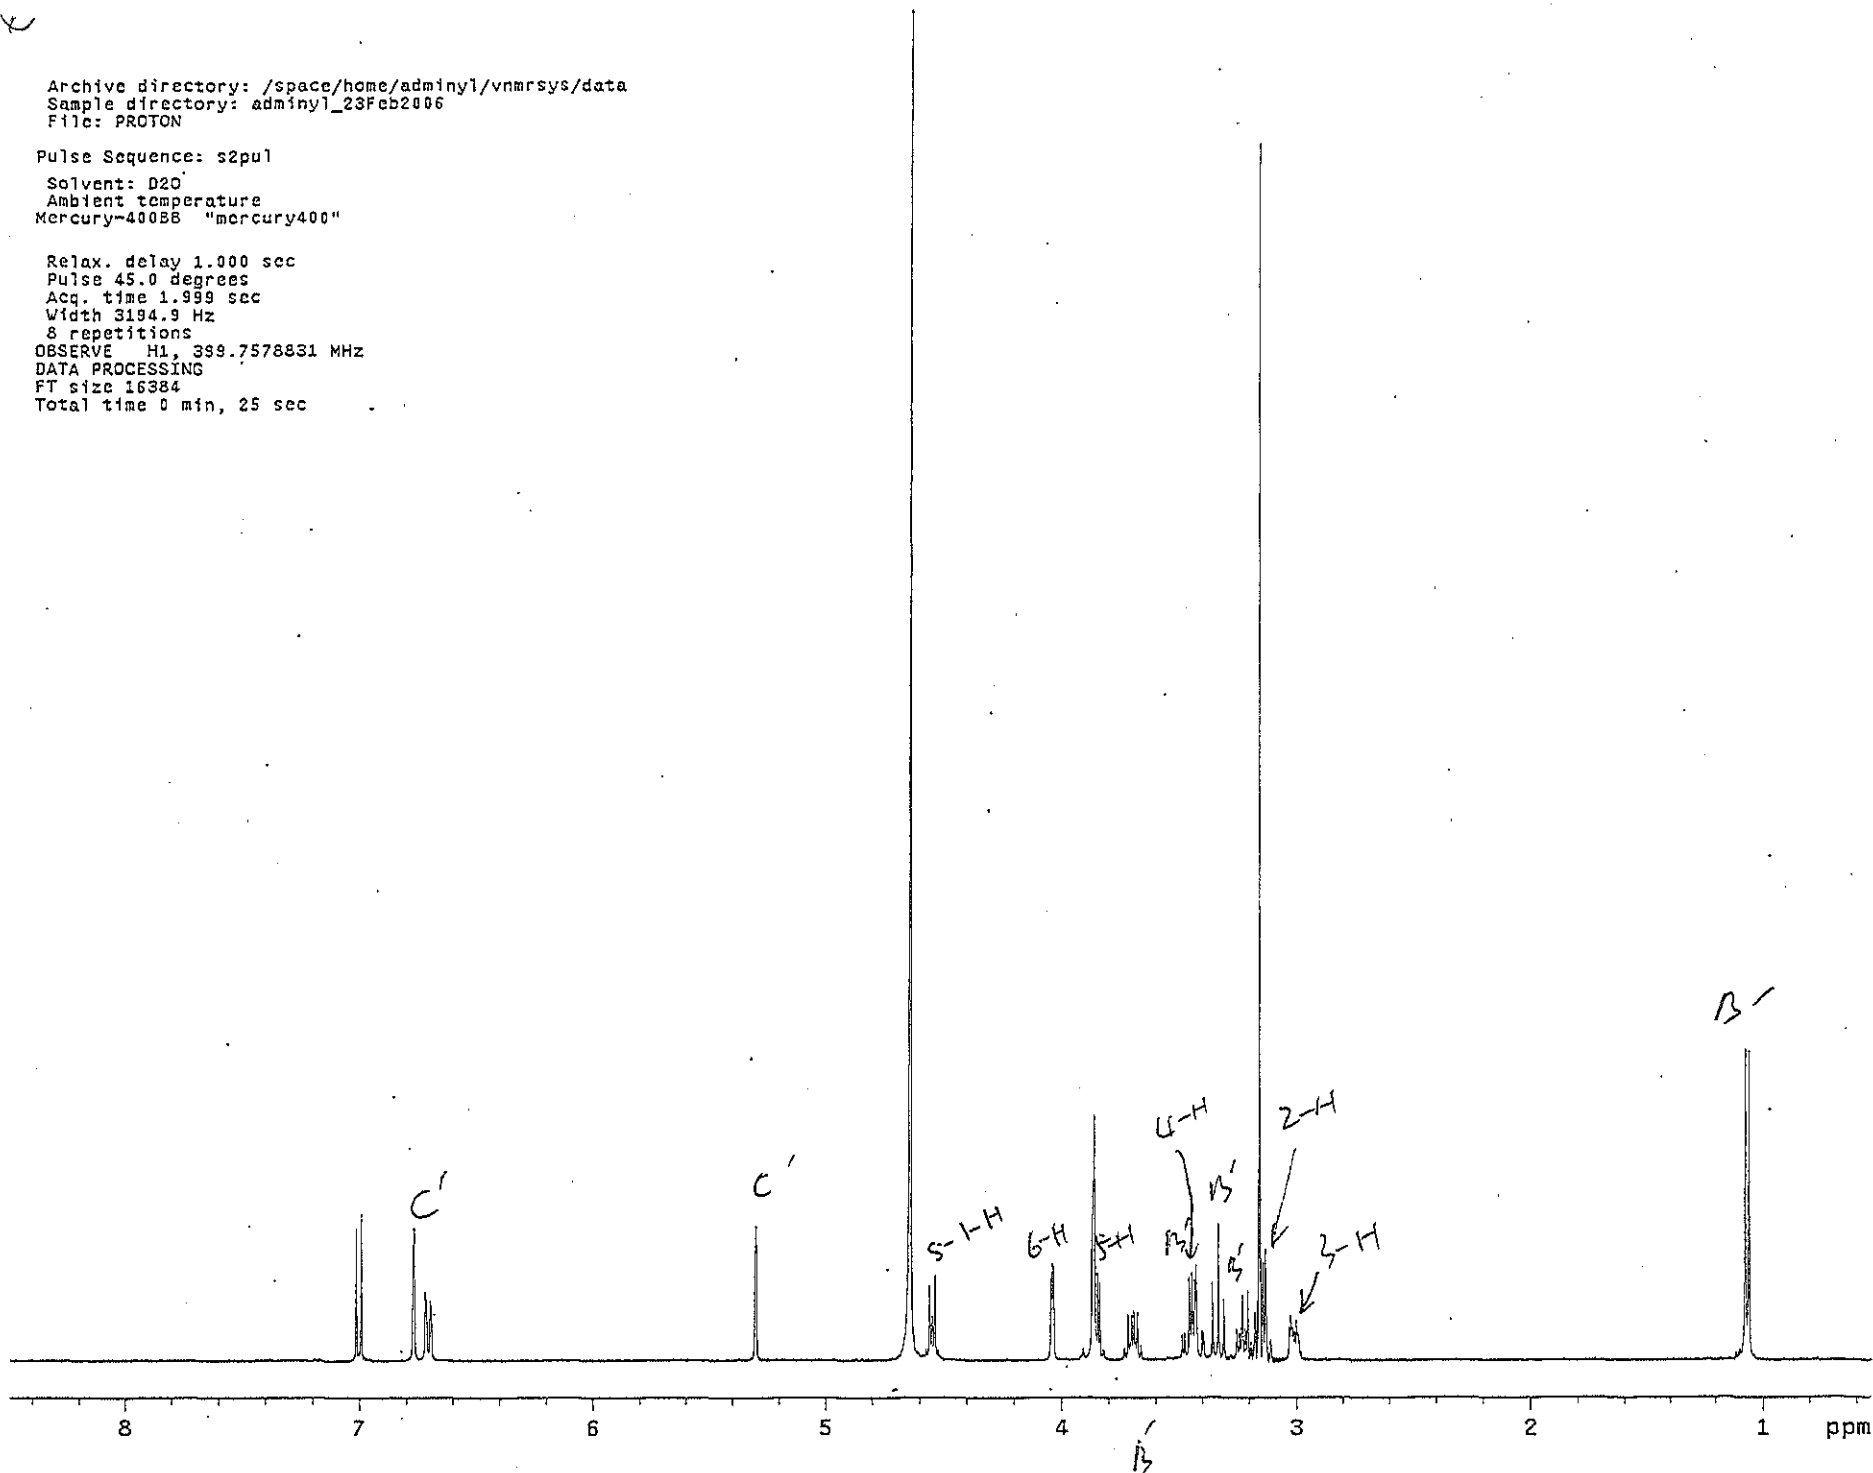

500

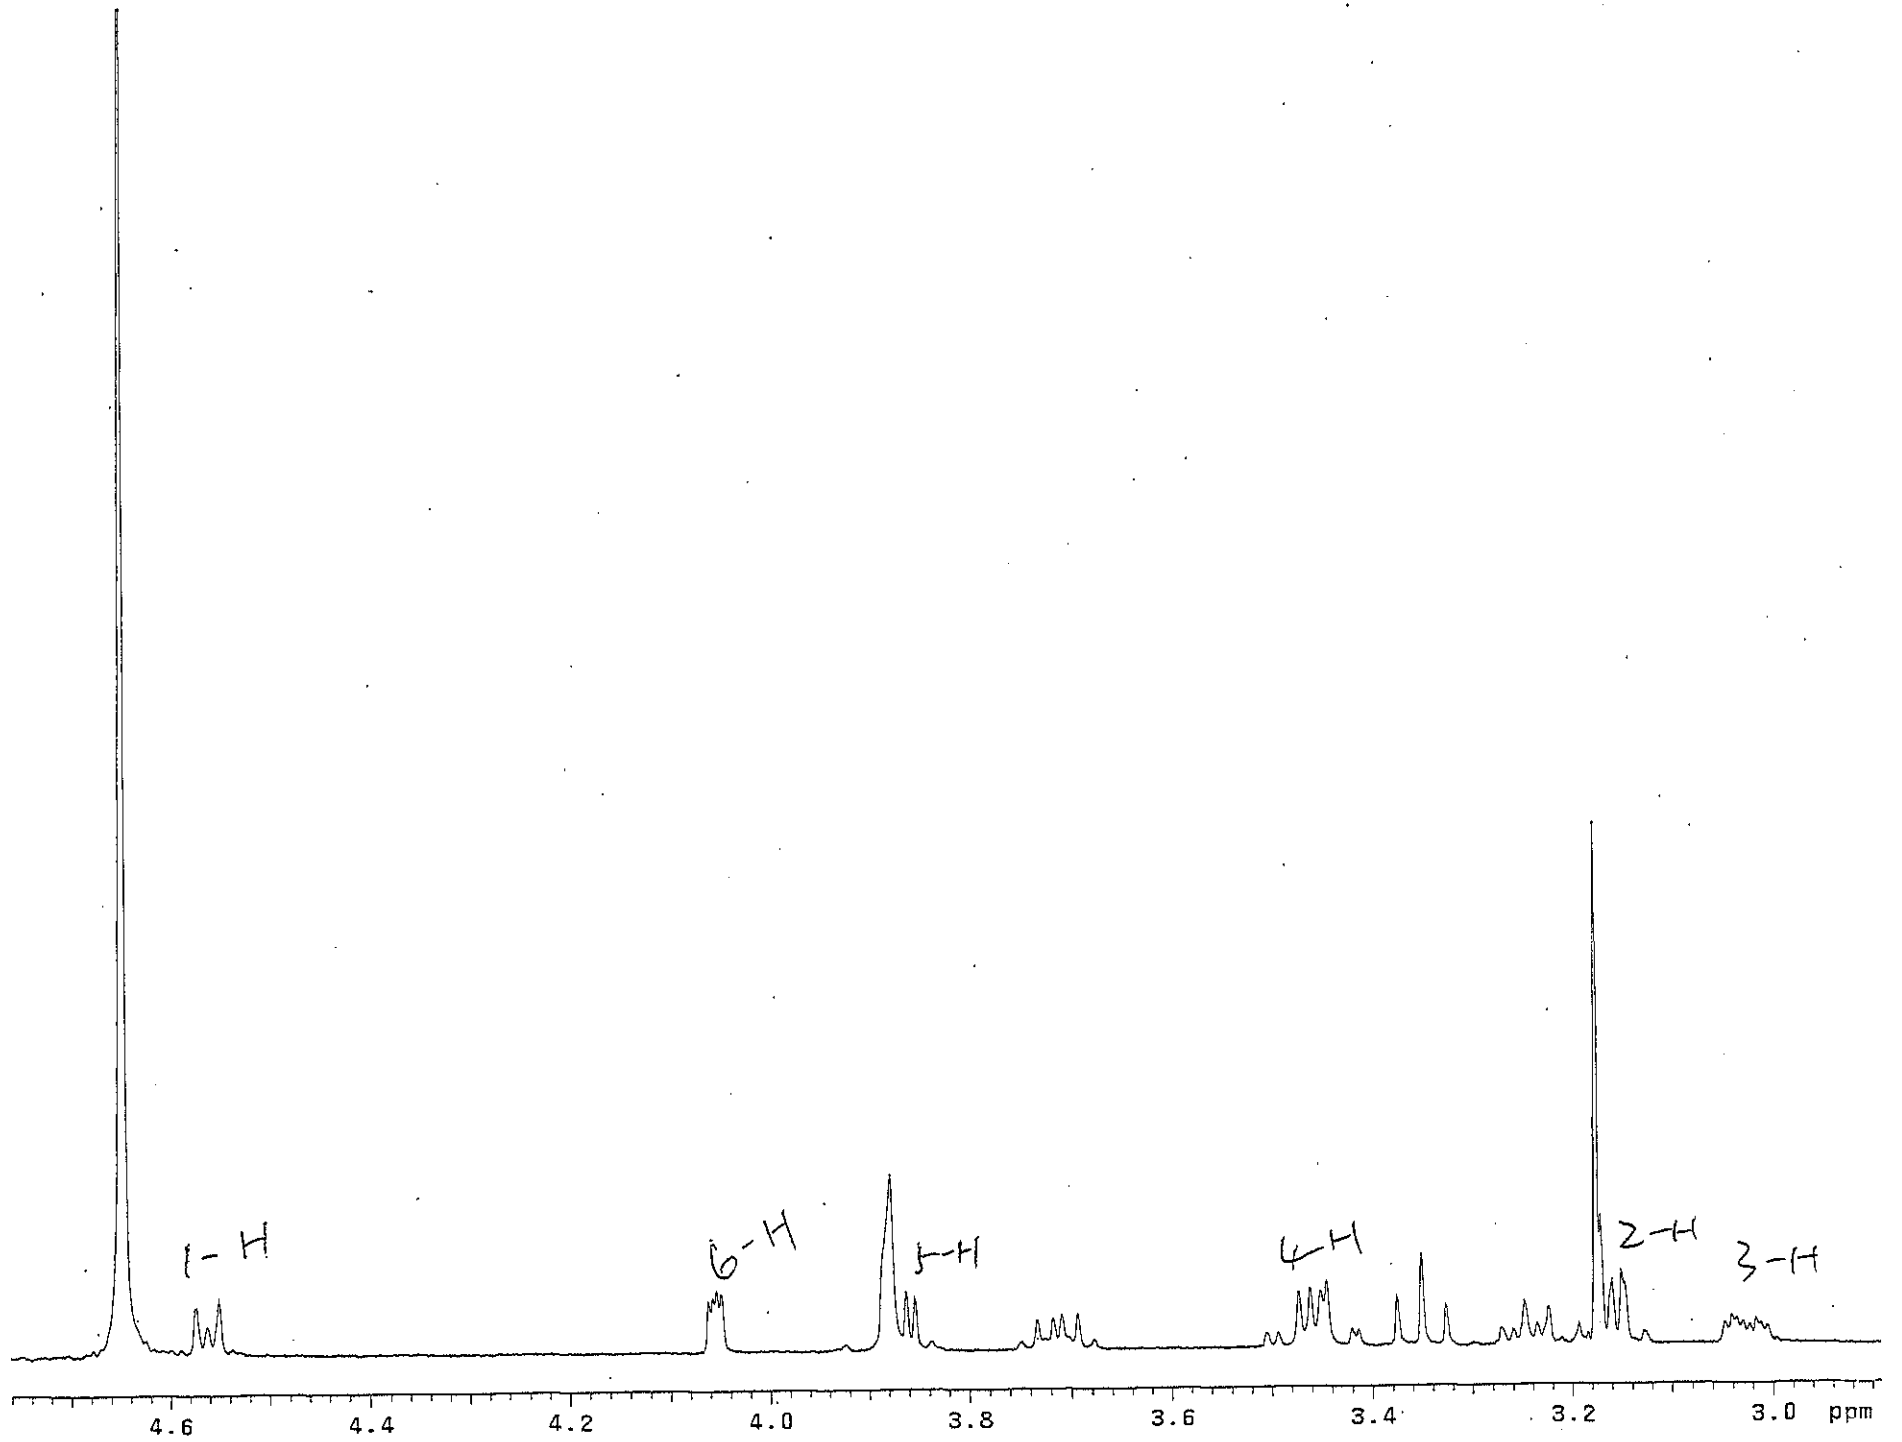

586

Archive directory: /space/home/admin1/vnmrsys/data  
Sample directory: admin1\_23Feb2006  
File: gCOSY

Pulse Sequence: gCOSY  
Solvent: D2O  
Ambient temperature  
Mercury-400BB "mercury400"

Relax. delay 1.000 sec  
Acq. time 0.160 sec  
Width 3191.8 Hz  
2D Width 3191.8 Hz  
Single scan  
128 increments  
OBSERVE H1, 399.7578831 MHz  
DATA PROCESSING  
Sq. sine bell 0.080 sec  
F1 DATA PROCESSING  
Sq. sine bell 0.040 sec  
FT size 1024 x 1024  
Total time 3 min, 37 sec

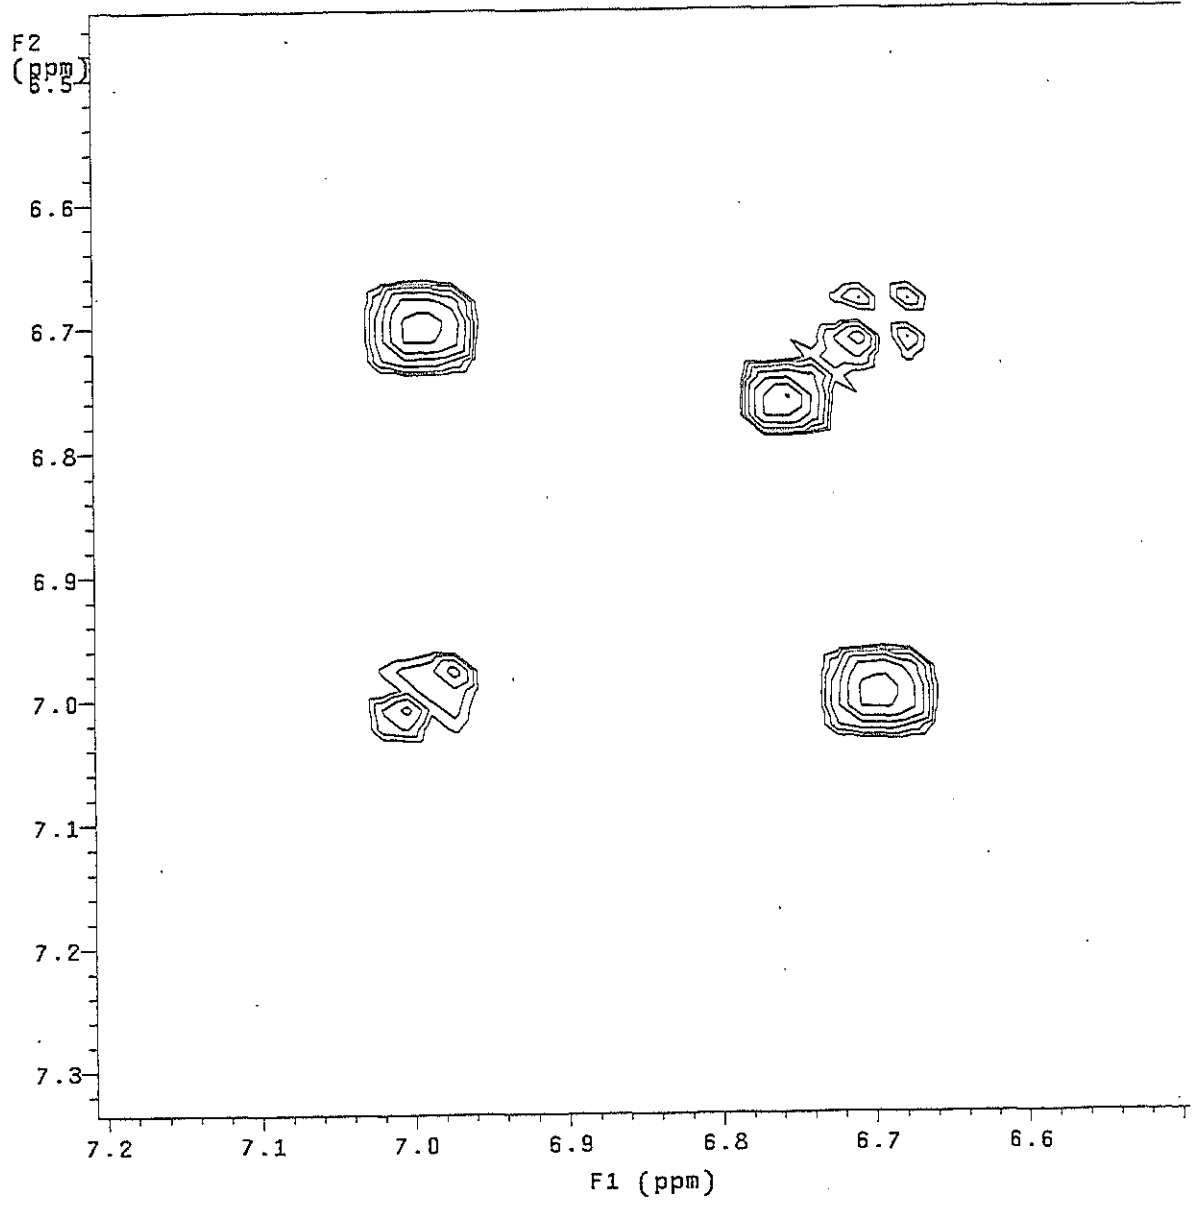

~~486~~  
586

$^{13}\text{C}$  - APT

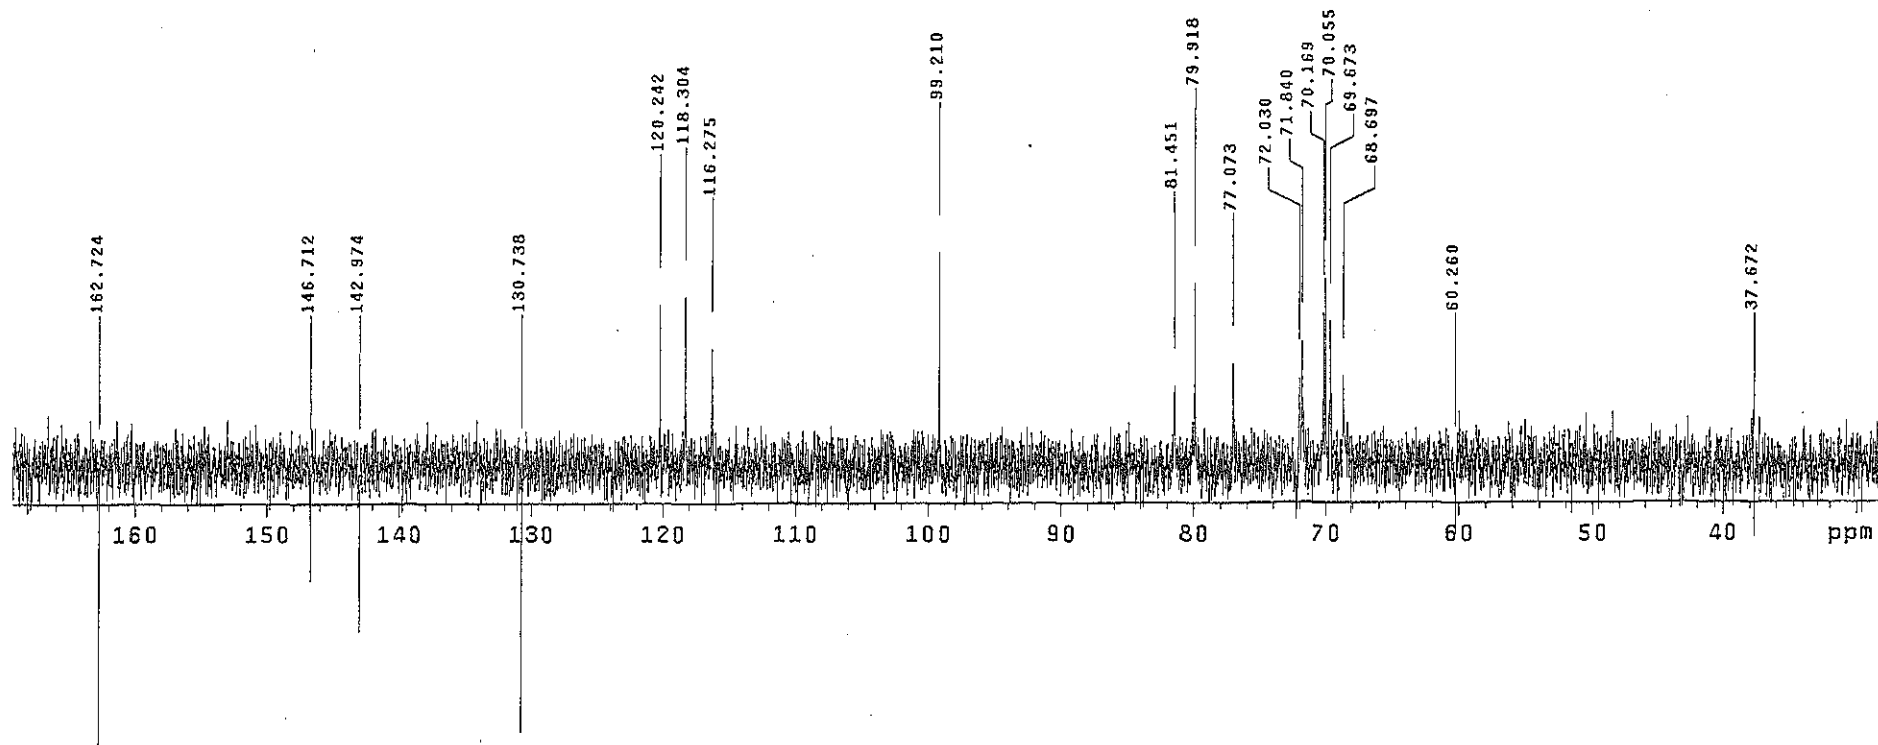

BLV  
50.

exp1 s2pu1

| SAMPLE      |             | SPECIAL    |          |
|-------------|-------------|------------|----------|
| date        | Feb 23 2006 | temp       | not used |
| solvent     | D2O         | gain       | not used |
| file        |             | sp1n       | not used |
| ACQUISITION |             |            |          |
| sw          | 6389.8      | pw90       | 13.700   |
| at          | 1.998       | alfa       | 20.000   |
| np          | 25528       | FLAGS      |          |
| fb          | not used    | ll         | n        |
| bs          | 16          | ln         | n        |
| d1          | 1.000       | dp         | y        |
| nt          | 4           | hs         | nn       |
| ct          | 4           | PROCESSING |          |
| TRANSMITTER |             | fn         | not used |
| tn          | H1          | DISPLAY    |          |
| sfrq        | 399.760     | sp         | 2138.0   |
| tof         | 437.6       | wp         | 772.2    |
| tpwr        | 58          | rfl        | 2650.6   |
| pw          | 8.850       | rfp        | 1918.8   |
| DECOUPLER   |             | rp         | 51.2     |
| dn          | C13         | lp         | -81.2    |
| dof         | 0           | PLOT       |          |
| dm          | nnn         | wc         | 250      |
| dmm         | c           | sc         | 0        |
| dpwr        | 48          | vs         | 200      |
| dmf         | 17100       | th         | 4        |
|             |             | nm         | cdc ph   |

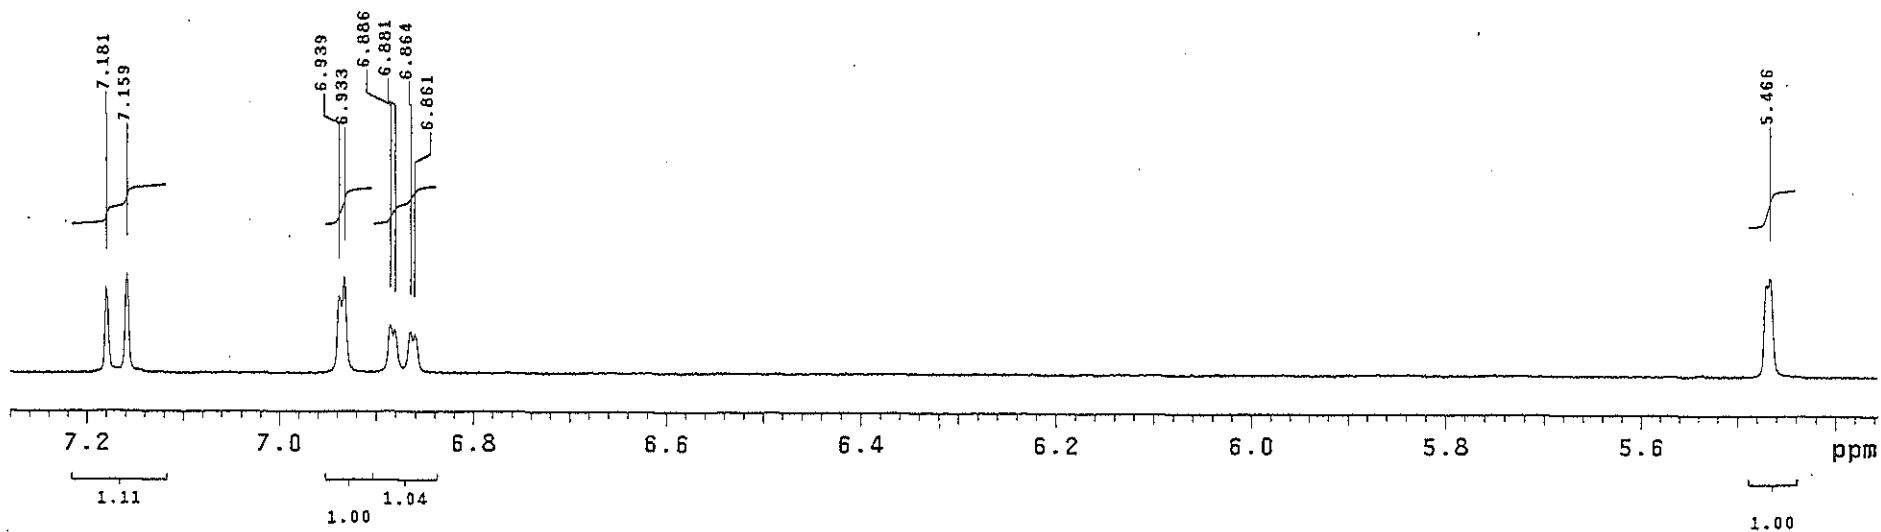



50

exp1 s2pu1

|             |             |            |          |
|-------------|-------------|------------|----------|
| SAMPLE      |             | SPECIAL    |          |
| date        | Feb 23 2006 | temp       | not used |
| solvent     | D2O         | gain       | not used |
| file        | exp         | spin       | not used |
| ACQUISITION |             | hst        | 0.008    |
| sw          | 6389.8      | pw90       | 13.700   |
| at          | 1.998       | alfa       | 20.000   |
| np          | 25528       | FLAGS      |          |
| fb          | not used    | il         | n        |
| bs          | 15          | in         | n        |
| d1          | 1.000       | dp         | y        |
| nt          | 4           | hs         | nn       |
| ct          | 4           | PROCESSING |          |
| TRANSMITTER |             | fn         | not used |
| tn          | H1          | DISPLAY    |          |
| sfrq        | 399.760     | sp         | 435.2    |
| tof         | 437.5       | wp         | 2502.0   |
| tpwr        | 58          | rfl        | 2650.6   |
| pw          | 6.850       | rfp        | 1918.8   |
| DECOUPLER   |             | rp         | 51.2     |
| dn          | C13         | lp         | -81.2    |
| dof         | 0           | PLOT       |          |
| dm          | nnn         | wc         | 250      |
| dmm         | c           | sc         | 0        |
| dpwr        | 48          | vs         | 200      |
| dmf         | 17100       | th         | 4        |
|             |             | nm         | cdc ph   |

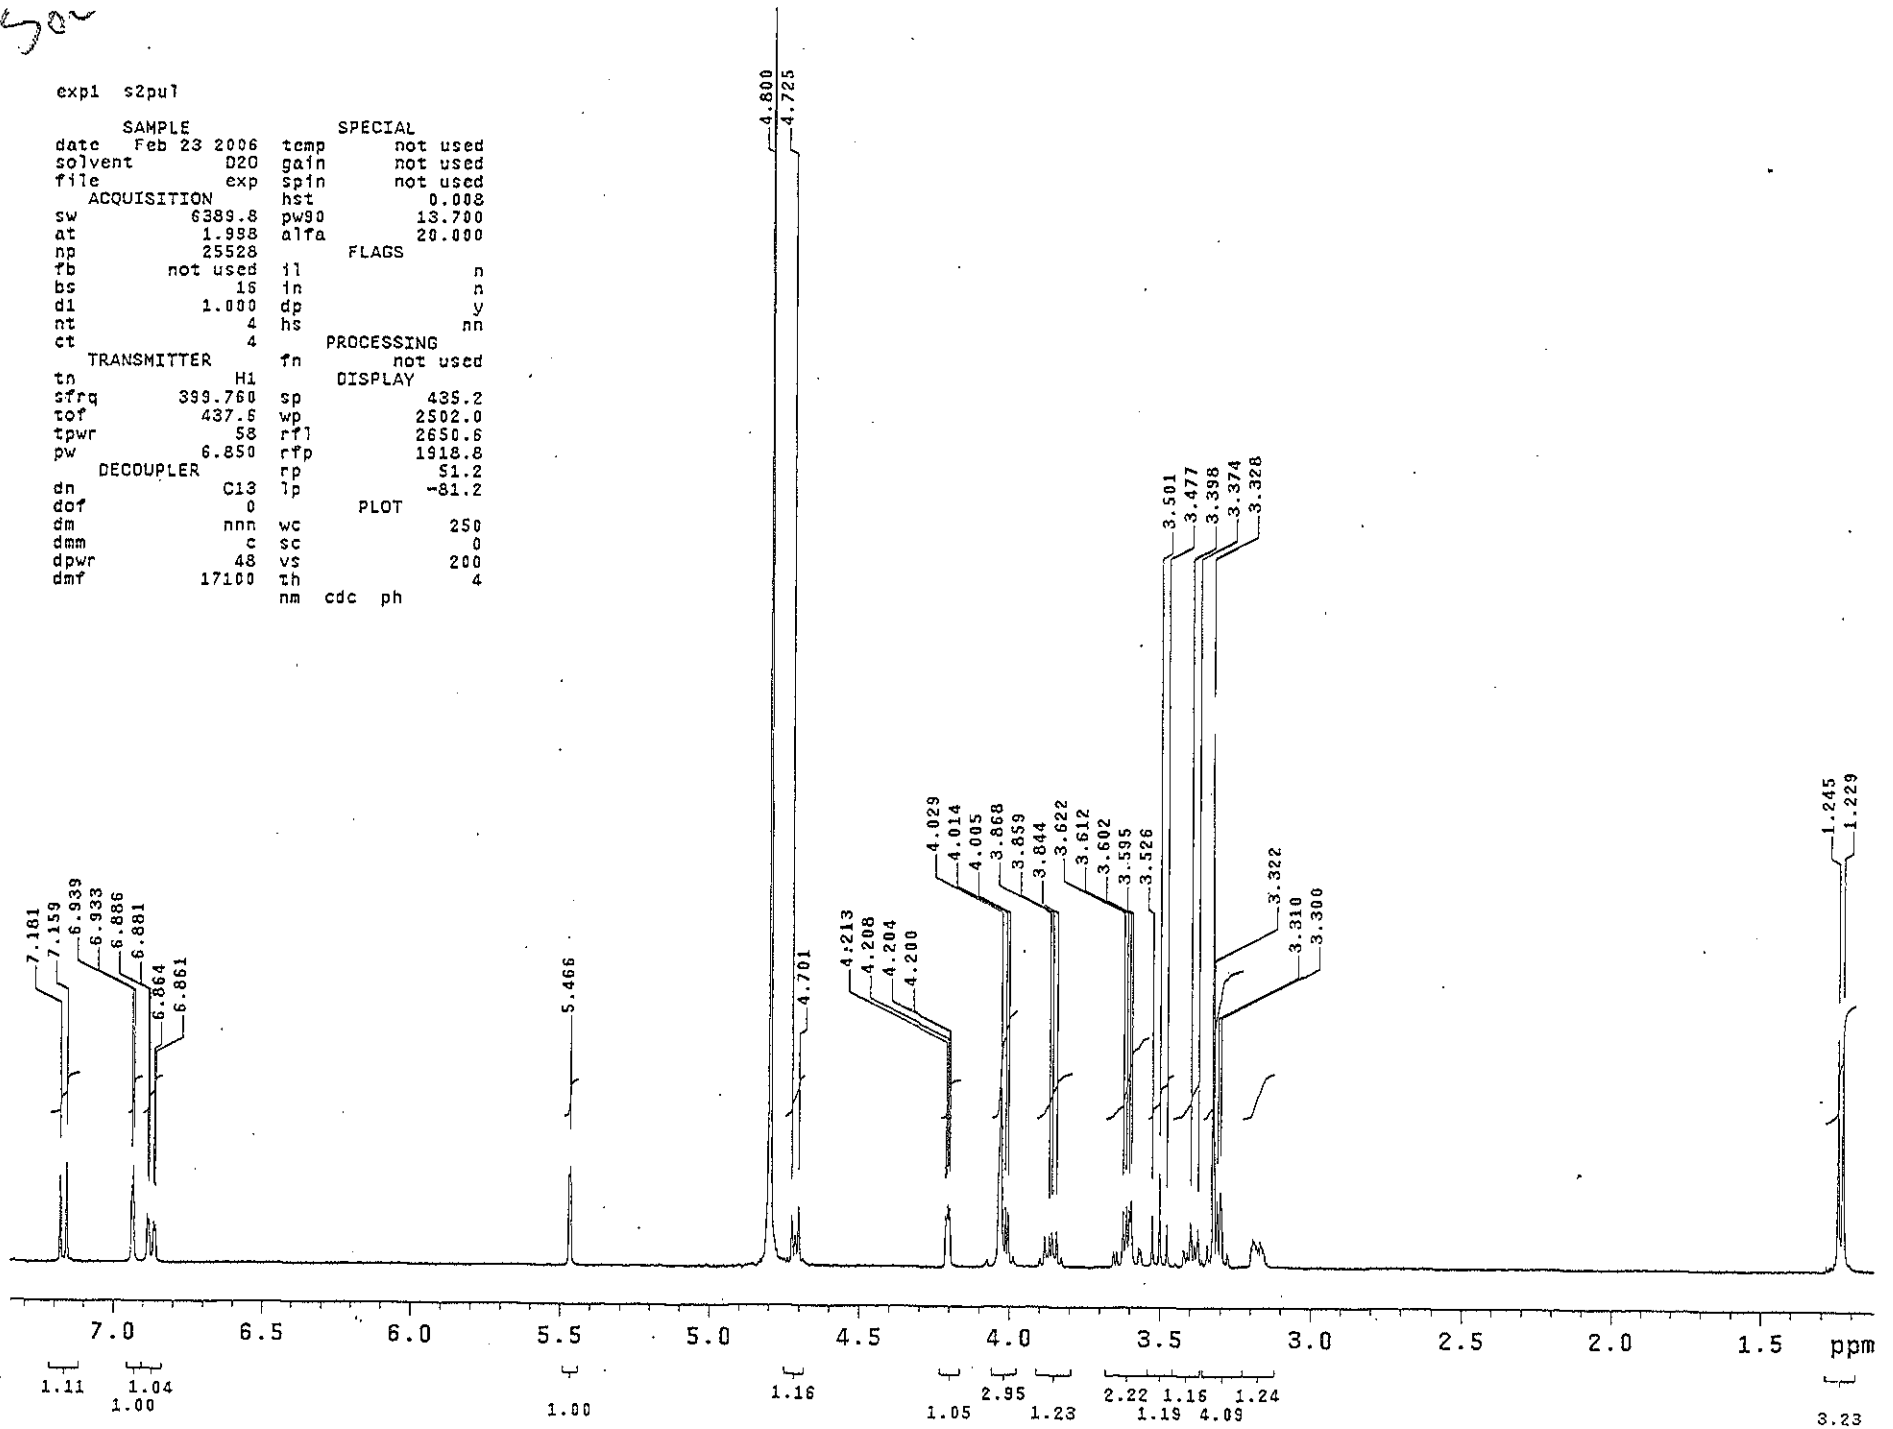

52

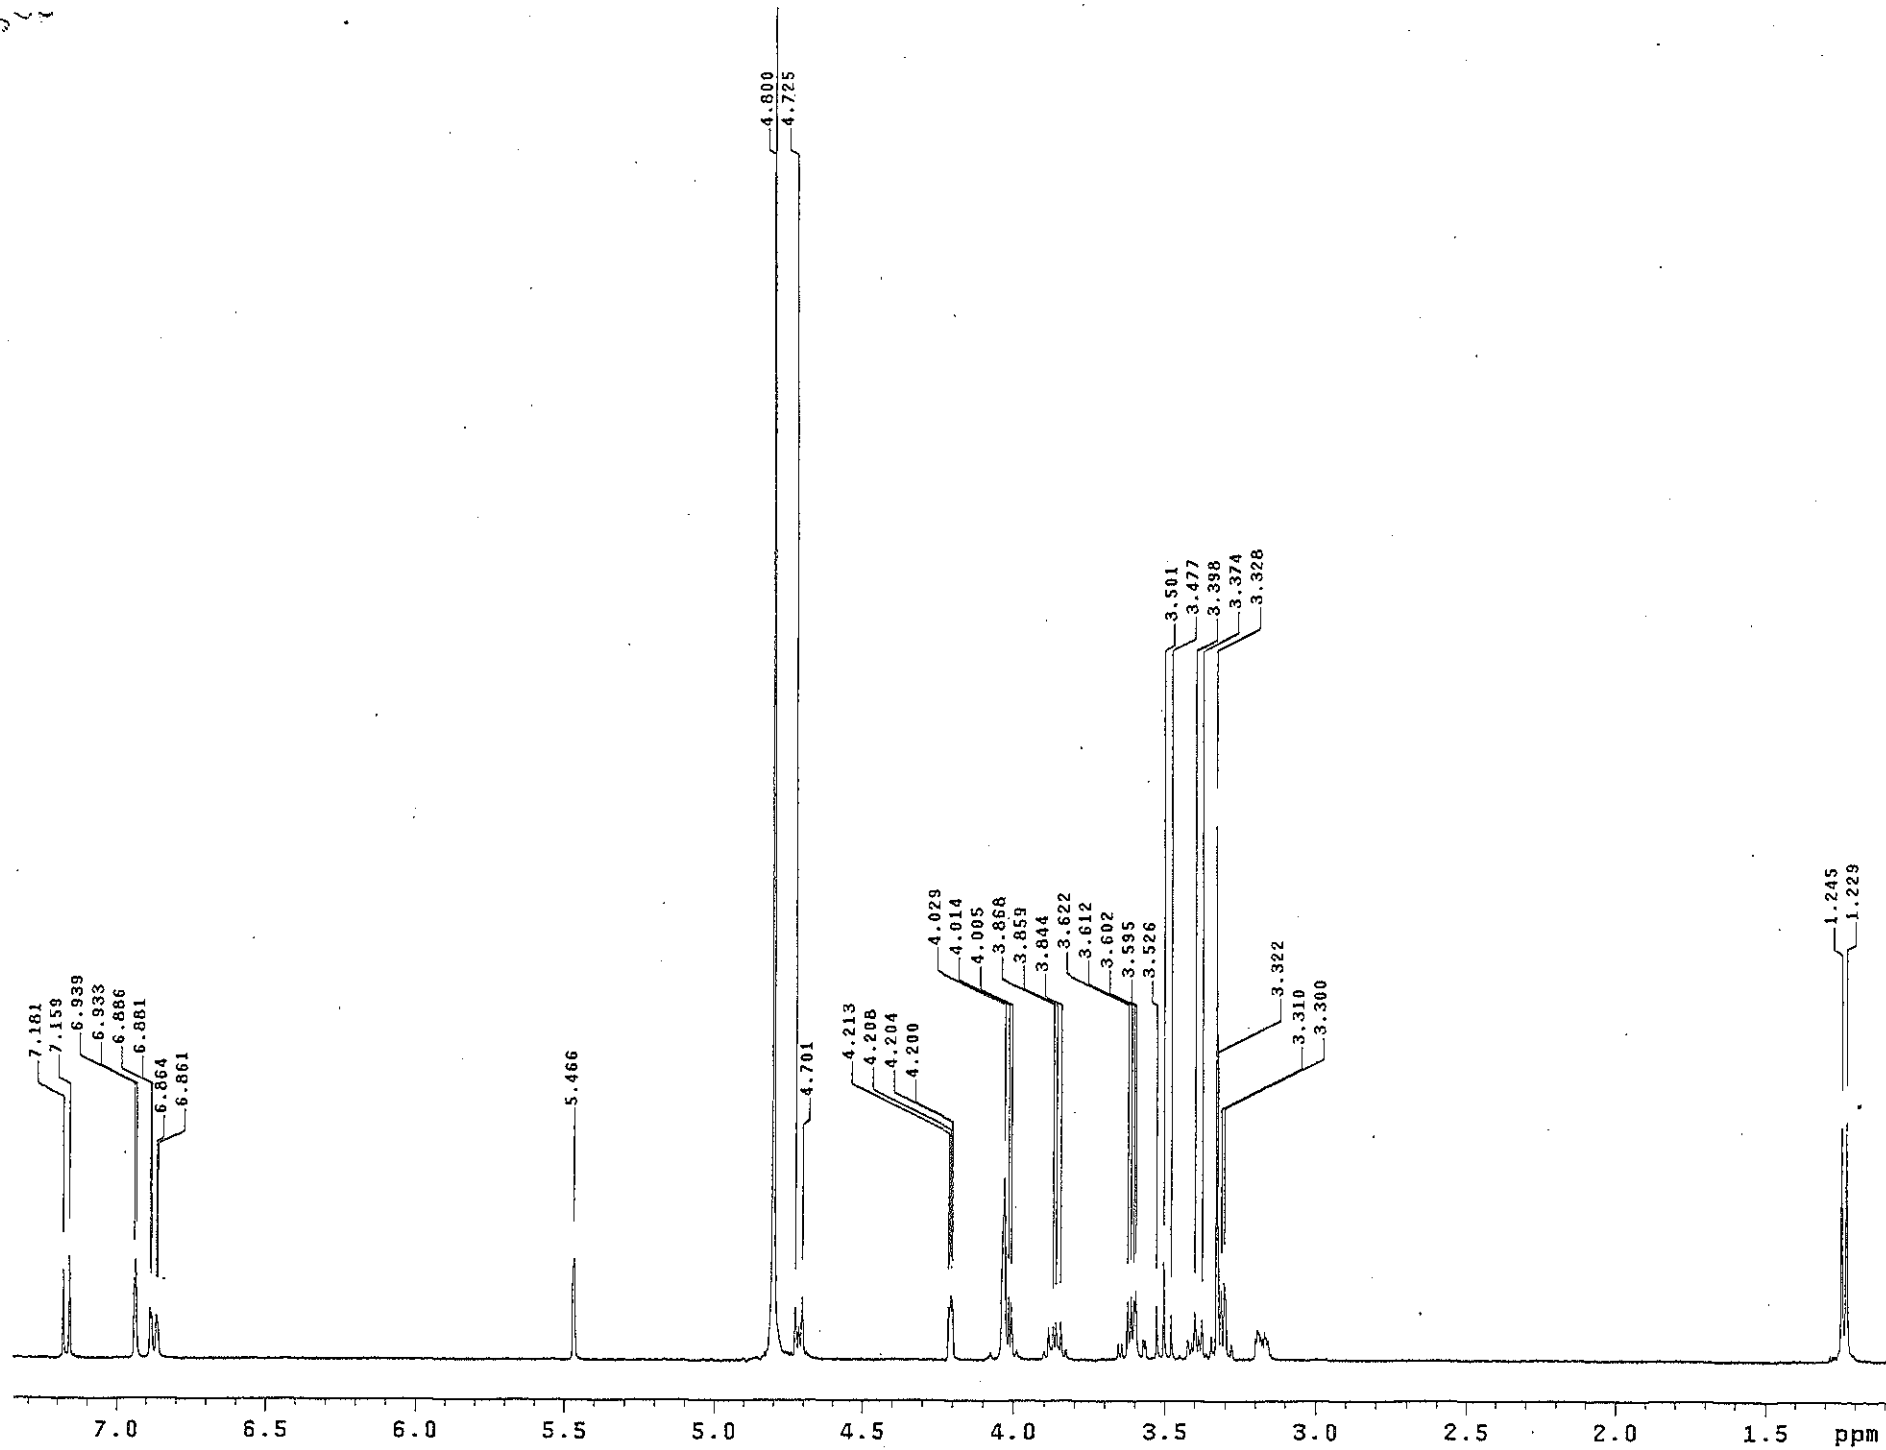

50%

exp1 s2pu1

4.800

|             |          |      |            |          |
|-------------|----------|------|------------|----------|
| date        | Feb 23   | 2006 | temp       | not used |
| solvent     | D2O      |      | gain       | not used |
| file        | exp      |      | spin       | not used |
| ACQUISITION |          |      | hst        | 0.008    |
| sw          | 6389.8   |      | pw90       | 13.700   |
| at          | 1.998    |      | alfa       | 20.000   |
| np          | 25528    |      | FLAGS      |          |
| fb          | not used |      | ll         | n        |
| bs          | 16       |      | ln         | n        |
| d1          | 1.000    |      | dp         | y        |
| nt          | 4        |      | hs         | nn       |
| ct          | 4        |      | PROCESSING |          |
| TRANSMITTER |          |      | fn         | not used |
| tn          | H1       |      | DISPLAY    |          |
| sfrq        | 398.760  |      | sp         | 1232.8   |
| tof         | 437.6    |      | wp         | 764.1    |
| tpwr        | 58       |      | rfl        | 2650.6   |
| pw          | 8.850    |      | rfp        | 1918.8   |
| DECOUPLER   |          |      | rp         | 51.2     |
| dn          | C13      |      | lp         | -81.2    |
| dof         | 0        |      | PLOT       |          |
| dm          | nnn      |      | wc         | 250      |
| dmm         | c        |      | sc         | 0        |
| dpwr        | 48       |      | vs         | 200      |
| dmt         | 7100     |      | th         | 3        |
|             |          |      | nm         | cdc ph   |

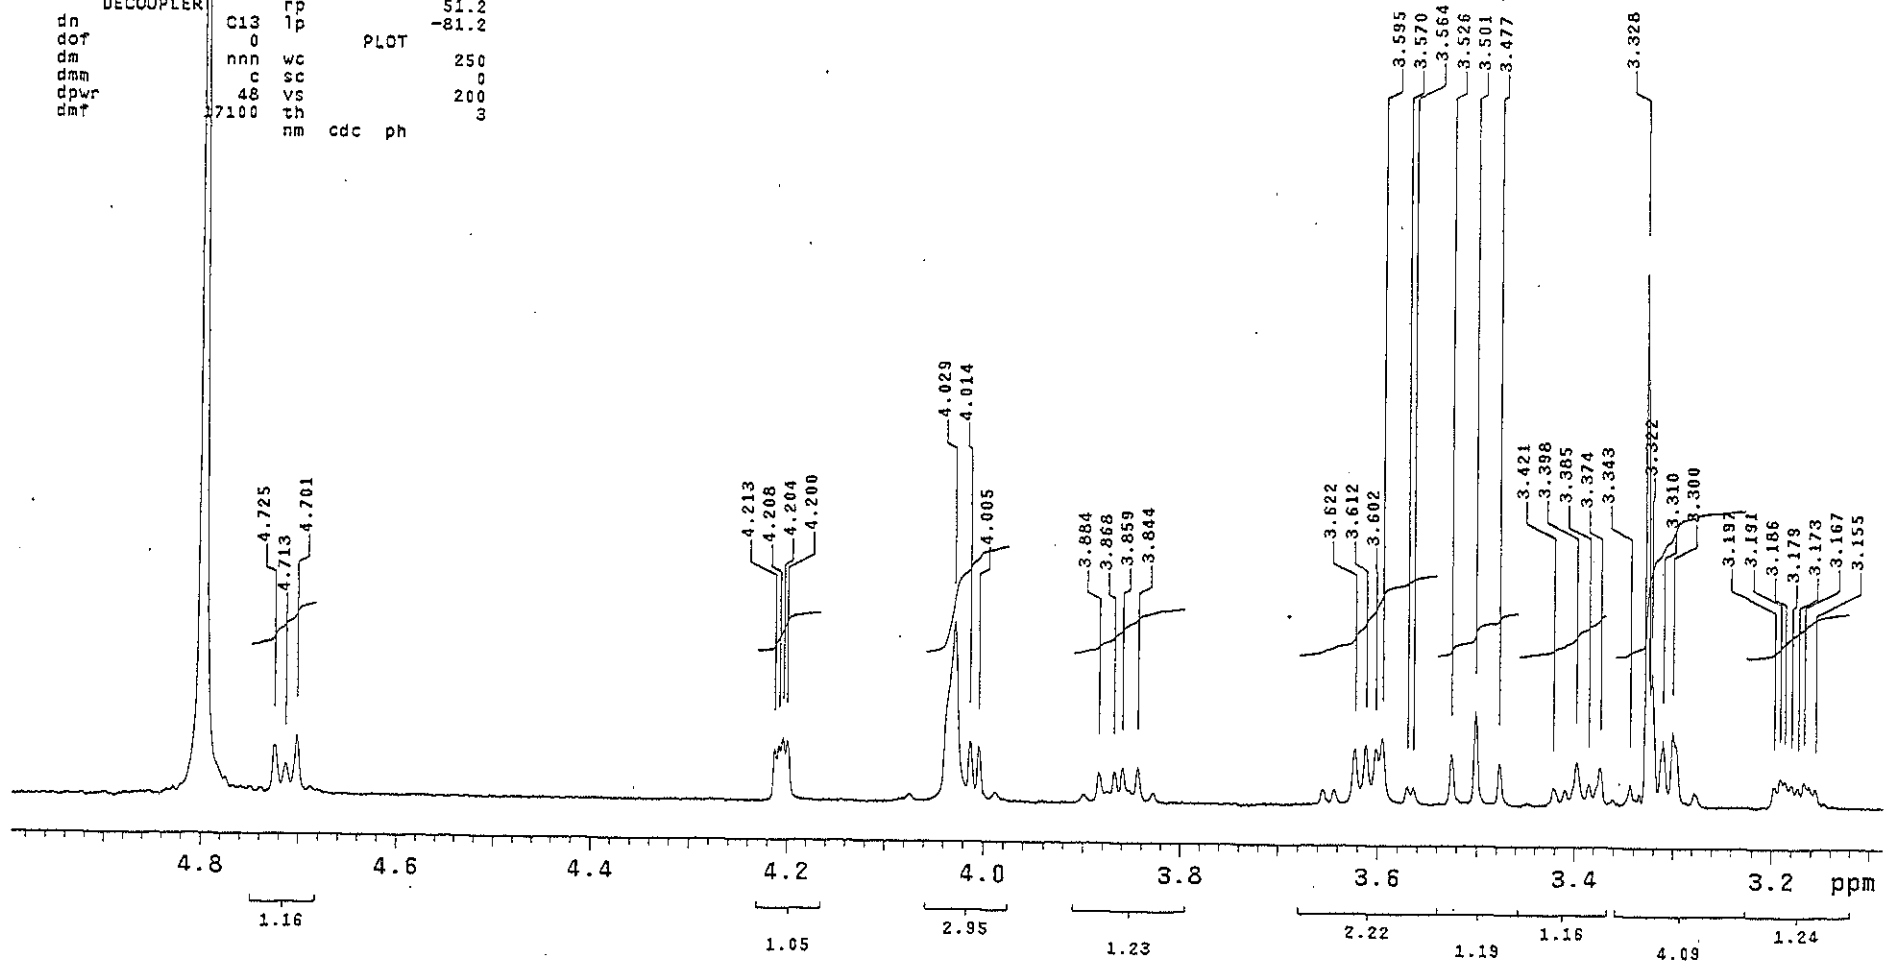

580

```
expl s2pul  
SAMPLE  
date Feb 23 2006 temp not used  
solvent D2O gain not used  
file exp spin not used  
ACQUISITION hst 0.008  
sw 25125.6 pw90 13.500  
at 1.199 alfa 20.000  
np 50270  
fb 13800  
bs 64  
d1 1.000  
nt 200000  
ct 18688  
TRANSMITTER lb 1.00  
tn C13 fn not used  
sfrq 100.530  
tof 1554.7 sp 1201.1  
tpwr 63 wp 16013.0  
pw 6.750 rff 1505.7  
DECOUPLER H1 rfp 0  
dn H1 rp 144.4  
dof 0 lp -271.4  
dm yyy PLOT  
dmm w wc 250  
dpwr 40 sc 0  
dmf 8900 vs 20  
 nm no ph th 5
```

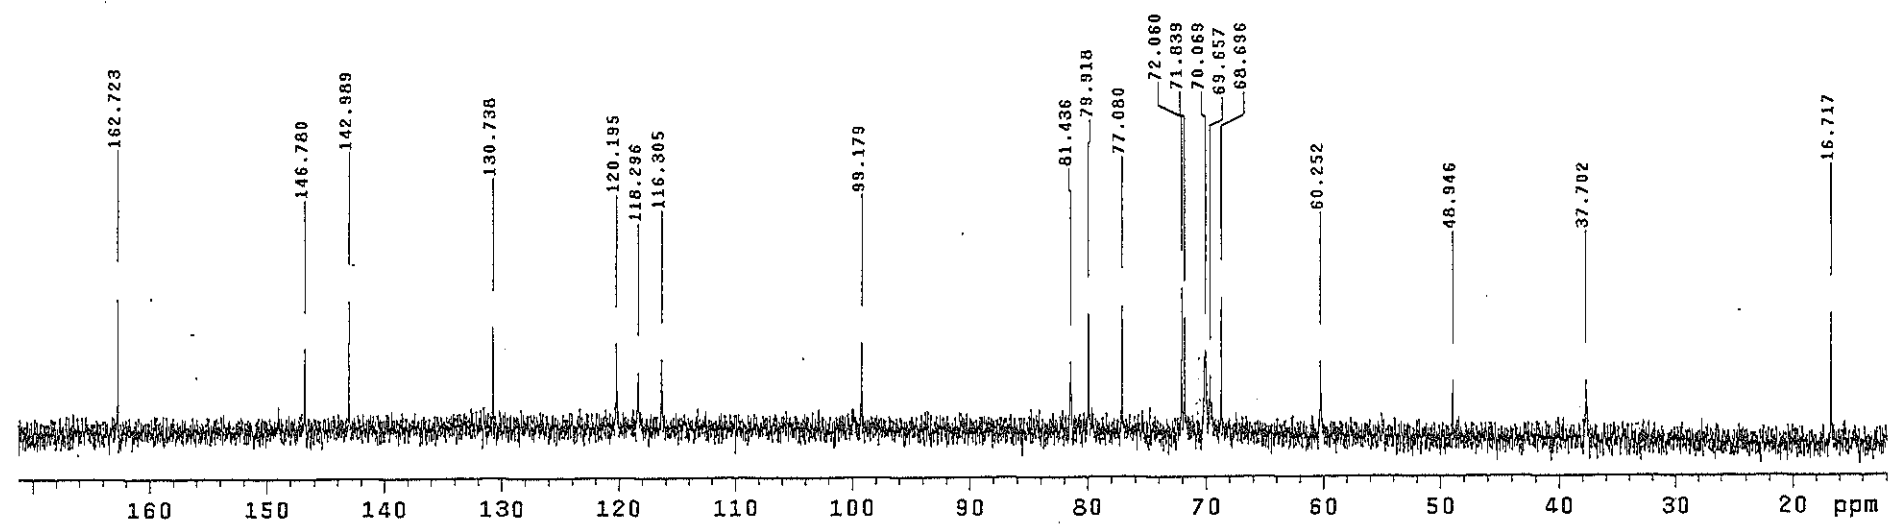

58K

Archive directory: /space/home/adminyl/vnmrsys/data  
Sample directory: adminyl\_23Feb2006  
File: gCOSY

Pulse Sequence: gCOSY  
Solvent: D2O  
Ambient temperature  
Mercury-400SB "mercury400"

Relax. delay 1.000 sec  
Acq. time 0.160 sec  
Width 3191.8 Hz  
2D Width 3191.8 Hz  
Single scan  
128 increments  
OBSERVE H1, 399.7578831 MHz  
DATA PROCESSING  
Sq. sine bell 0.080 sec  
F1 DATA PROCESSING  
Sq. sine bell 0.040 sec  
FT size 1024 x 1024  
Total time 3 min, 37 sec

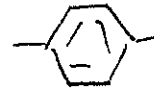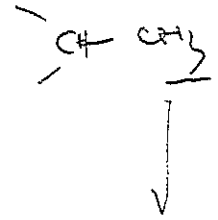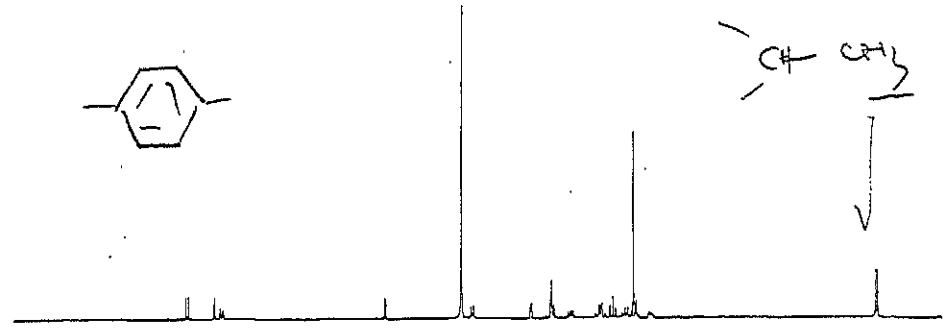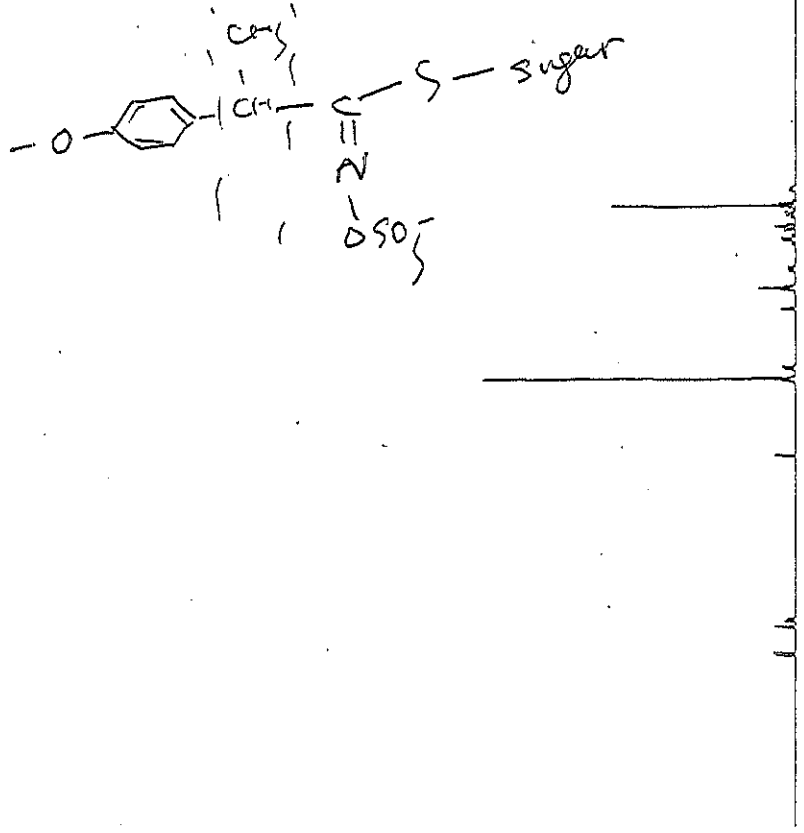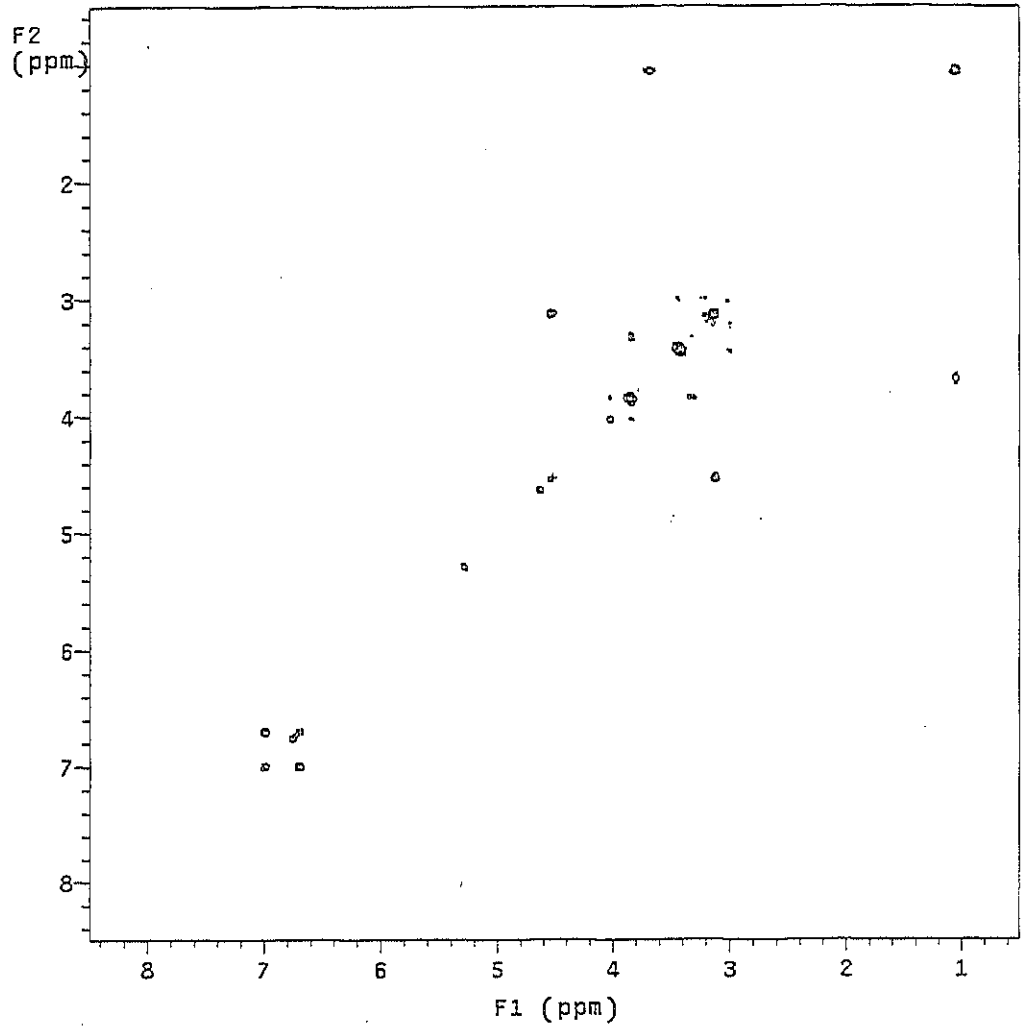

586

Archive directory: /space/home/adminyl/vnmrsys/data  
Sample directory: adminyl\_23Feb2006  
File: gCOSY

Pulse Sequence: gCOSY  
Solvent: D2O  
Ambient temperature  
Mercury-400BB "mercury400"

Relax. delay 1.000 sec  
Acq. time 0.160 sec  
Width 3191.8 Hz  
2D Width 3191.8 Hz  
Single scan  
128 increments  
OBSERVE H1, 399.7578831 MHz  
DATA PROCESSING  
Sq. sine bell 0.080 sec  
F1 DATA PROCESSING  
Sq. sine bell 0.040 sec  
FT size 1024 x 1024  
Total time 3 min, 37 sec

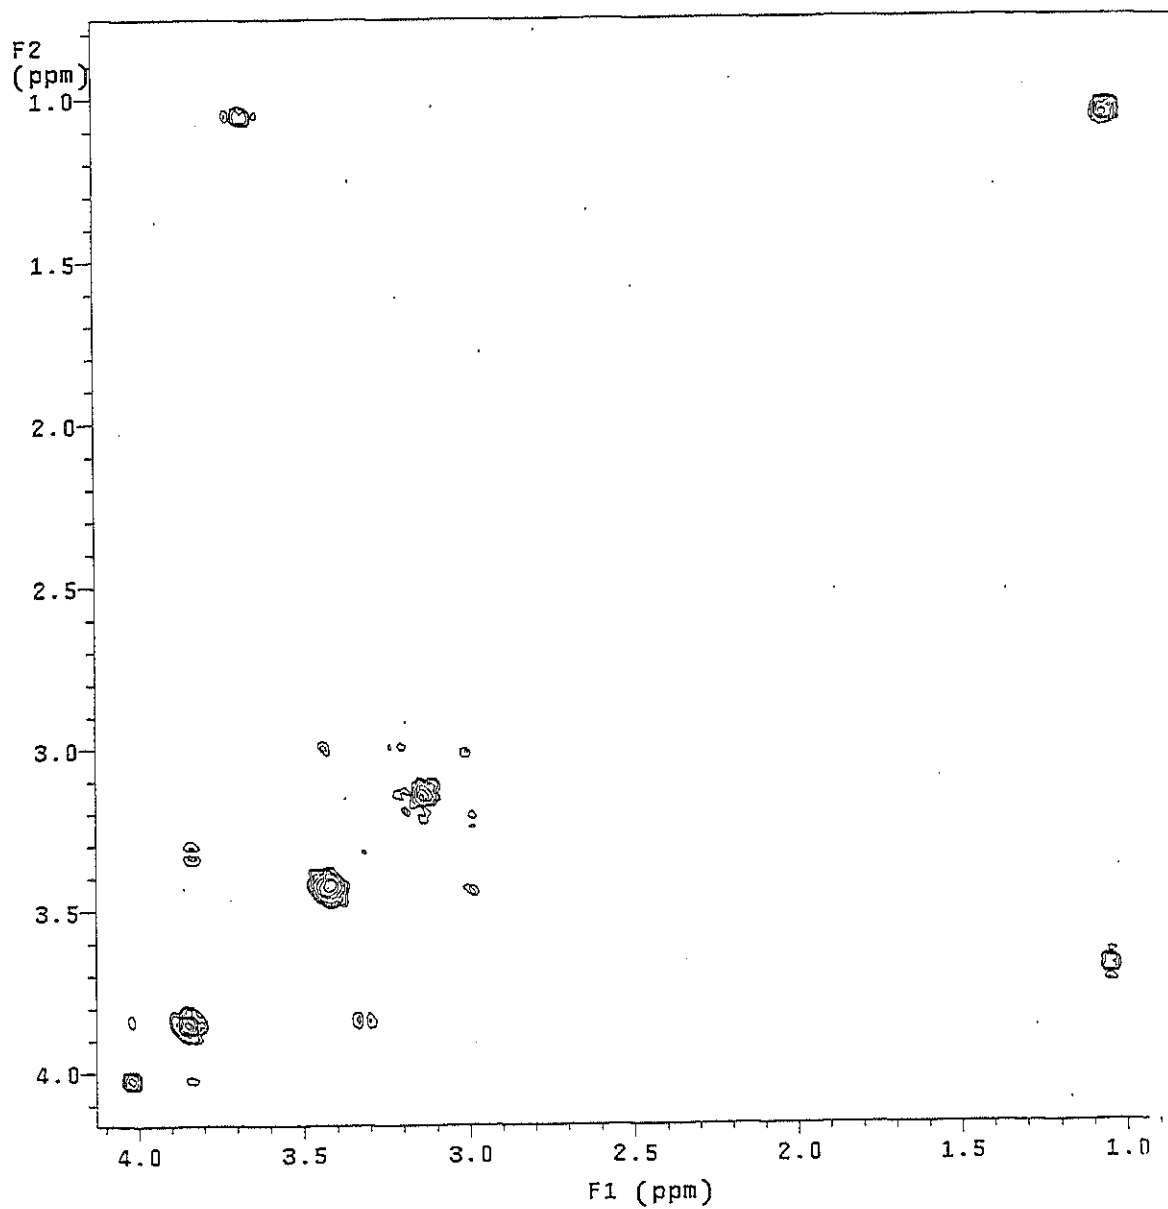

584

Archive directory: /space/home/admin1/vnmrsys/data  
Sample directory: admin1\_23Feb2008  
File: gCOSY

Pulse Sequence: gCOSY  
Solvent: D2O  
Ambient temperature  
Mercury-400BB "mercury400"

Relax. delay 1.000 sec  
Acq. time 0.160 sec  
Width 3191.8 Hz  
2D Width 3191.8 Hz  
Single scan  
128 increments  
OBSERVE H1, 399.7578831 MHz  
DATA PROCESSING  
Sq. sine bell 0.080 sec  
F1 DATA PROCESSING  
Sq. sine bell 0.040 sec  
FT size 1024 x 1024  
Total time 3 min, 37 sec

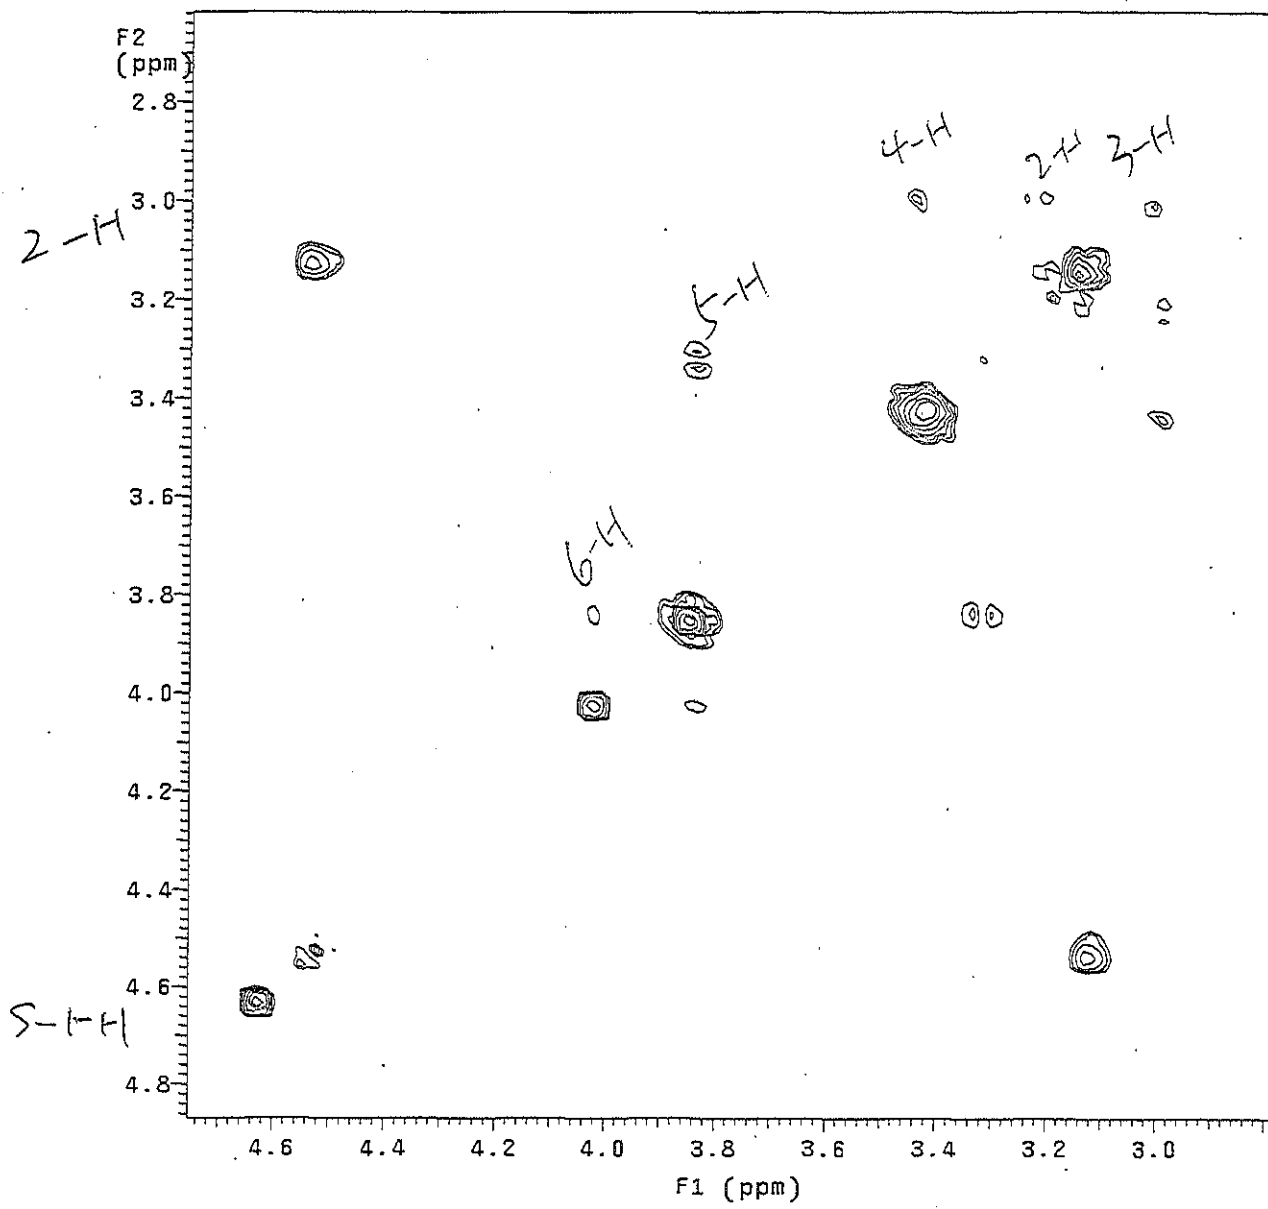

**Supplemental Table S1.** Means and ranges of percent peak areas of the main glucosinolate categories across the 14 taxa of *Moringa* examined.

| Species                                 | Alkyl                                     | Benzyl       | 4RB (moringin)                                | 4GB (glucosoonjnain)                  | N                 |
|-----------------------------------------|-------------------------------------------|--------------|-----------------------------------------------|---------------------------------------|-------------------|
| <i>arborea</i>                          | 0                                         | 0            | 94.2 (93.3-95.1)<br>88.8S<br>100E<br>88.8I    | 5.85 (4.9-6.8)<br>11.2I               | 2L, 1E, 1I        |
| <i>borziana</i>                         | 0                                         | 0            | 32.37 (0.6-94)<br>2.1S<br>52E                 | 67.67 (6-99.4)<br>97.9S<br>48E        | 3L, 1S, 1E        |
| <i>concanensis</i>                      | 0                                         | 0            | 10.75 (9.7-11.8)<br>20.7S                     | 73.15 (70.4-75.9)<br>44.2S            | 2L, 2S            |
| <i>concanensis</i> X<br><i>oleifera</i> | 0                                         | 0            | 84.48 (69.4-98.7)                             | 15.03 (1.3-30)                        | 4                 |
| <i>drouhardii</i>                       | 0                                         | 0            | 80.51 (56-100)<br>100E                        | 19.49 (0-44)                          | 7L, 1E            |
| <i>hildebrandtii</i>                    | 0                                         | 0            | 99.52 (98.5-100)                              | 0.47 (0-1.5)                          | 6                 |
| <i>longituba</i>                        | 94.19 (75.5-100)<br>100S<br>100E<br>95.7B | 0            | 0<br>4.3S                                     | 5.81 (0-24.5)                         | 8L, 1S,<br>1E, 1B |
| <i>oleifera</i> (domestic)              | 0                                         | 0            | 98.49 (86.6-100.1)<br>75.23 (3.3-99.4)S       | 1.32 (0-13.4)<br>17.28 (0.4-67.4)     | 27L, 4S           |
| <i>oleifera</i> (wild type)             | 0                                         | 0            | 37.17 (0.3-98.6)<br>0.8S                      | 51.36 (0.7-98.9)<br>62S               | 15L, 1S           |
| <i>ovalifolia</i>                       | 0                                         | 0            | 39.74 (9.8-76.1)<br>76.2S                     | 57.44 (23.95-82.6)<br>23.9S           | 6L, 2S            |
| <i>peregrina</i>                        | 0                                         | 0            | 87.18 (60.4-99.2)<br>89.65 (88-91.3)S<br>100E | 3.89 (0-21.7)<br>5.55 (2.4-8.7)S      | 8L, 2S, 1E        |
| <i>rivae</i>                            | 0                                         | 24.90 (0-44) | 15.46 (2.3-54.6)<br>70.4 (52.2-88.6)S         | 53.69 (9.5-97.8)<br>29.1 (10.8-47.4)S | 6L, 2S            |
| <i>ruspoliana</i>                       | 0                                         | 0            | 75.35 (54.6-99.3)                             | 6.83 (0-38.2)                         | 6                 |
| <i>stenopetala</i>                      | 0                                         | 0            | 99.17 (97.4-100.1)<br>99S<br>100E             | 0.87 (0-2.6)<br>1S                    | 3L, 1S, 1E        |

Unless indicated, means and ranges refer to leaves. Values designated with the following letters refer to these plant fractions: E=exudate; S=seed; I=inflorescence axis; B=bark



**Supplementary Table S2.** Provenance of plants or plant organs collected, along with cataloging of glucosinolates found in each of these samples (based on percent of total glucosinolates).

Title: The Diversity of Chemoprotective Glucosinolates in Moringaceae (*Moringa* spp.)

Authors: Jed W. Fahey, Mark E. Olson, Katherine K. Stephenson, Kristina L. Wade, Gwen M. Chodur, David Odee, Wasif Noumann, Michael Massiah, Jesse Alt, Patricia A. Egner, Walter C. Hubbard

| Moringa species       | Collector | Collection |                                                                                                   | leaf/other         | organ type            | leaf ontogenetic stage | % of total GSS |       |        |               |                |
|-----------------------|-----------|------------|---------------------------------------------------------------------------------------------------|--------------------|-----------------------|------------------------|----------------|-------|--------|---------------|----------------|
|                       |           | #          | Locality                                                                                          |                    |                       |                        | MeEt           | Alkyl | Benzyl | glucomoringin | glucosoonjnain |
| arborea               | Olson     | 714        | Kenya: ca. 35 km NW of Rhamu on road to Malka Mari                                                | inflorescence      | inflorescence         |                        | 0              | 0     | 0      | 88.8          | 11.2           |
| arborea               | Olson     | 714        | Kenya: ca. 35 km NW of Rhamu on road to Malka Mari                                                | leaf               | fresh leaf            | expanding              | 0              | 0     | 0      | 95.1          | 4.9            |
| arborea               | Olson     | 714        | Kenya: ca. 35 km NW of Rhamu on road to Malka Mari                                                | leaf               | fresh leaf            | mature                 | 0              | 0     | 0      | 93.3          | 6.8            |
| arborea               | Olson     | 714        | Kenya: ca. 35 km NW of Rhamu on road to Malka Mari                                                | leaf gland exudate | leaf gland exudate    |                        | 0              | 0     | 0      | 100           | 0              |
| borziana              | IMGC      | 375        | Kenya: grown from seed provided by Alain Rzepecky, locality unknown                               | leaf               | fresh leaf            | expanding              | 0              | 0     | 0      | 94            | 6              |
| borziana              | IMGC      | 375        | Kenya: grown from seed provided by Alain Rzepecky, locality unknown                               | leaf gland exudate | leaf gland exudate    |                        | 0              | 0     | 0      | 52            | 48             |
| borziana              | Olson     | 678        | Kenya: Taita District, ca. 50 m outside Tsavo E National Park Voi Gate                            | leaf               | silica gel dried leaf | mature                 | 0              | 0     | 0      | 0.6           | 99.4           |
| borziana              | Olson     | 707        | Kenya: Kilifi District: Near airstrip at camp on Galana Ranch                                     | leaf               | silica gel dried leaf | mature                 | 0              | 0     | 0      | 2.5           | 97.6           |
| borziana              | Olson     | 5660       | Kenya: former Coast Province: Voi area                                                            | seed               | seed                  |                        | 0              | 0     | 0      | 2.1           | 97.9           |
| concanensis           | Olson     | 700        | India: Tamil Nadu: Palani Hills near Oddanchatram                                                 | leaf               | silica gel dried leaf | mature                 | 12.4           | 0     | 0      | 11.8          | 75.9           |
| concanensis           | Olson     | 700        | India: Tamil Nadu: Palani Hills near Oddanchatram                                                 | seed               | seed                  |                        | 35.2           | 0     | 0      | 20.7          | 44.2           |
| concanensis           | Rao       | s.n.       | India: Rajasthan: Barmer (collected by S. Rama Rao, Feb 1997)                                     | leaf               | silica gel dried leaf | mature                 | 20             | 0     | 0      | 9.7           | 70.4           |
| drouhardii            | Olson     | 25         | USA: Arid Lands nursery, Tucson, Arizona                                                          | leaf               | fresh leaf            | expanding              | 0              | 0     | 0      | 69.6          | 30.4           |
| drouhardii            | Olson     | 679        | Madagascar: Toliara near Amboasary                                                                | leaf               | silica gel dried leaf | mature                 | 0              | 0     | 0      | 60.3          | 39.7           |
| drouhardii            | Olson     | 5707       | USA: Hawaii: Koko Crater Botanical Garden                                                         | leaf               | fresh leaf            | expanding              | 0              | 0     | 0      | 77.8          | 22.2           |
| drouhardii            | Olson     | 5707       | USA: Hawaii: Koko Crater Botanical Garden                                                         | leaf               | fresh leaf            | mature                 | 0              | 0     | 0      | 99.9          | 0.1            |
| drouhardii            | Olson     | 5708       | Madagascar: Toliara: Toliara town                                                                 | leaf               | fresh leaf            | mature                 | 0              | 0     | 0      | 56            | 44             |
| drouhardii            | Olson     | 5708       | Madagascar: Toliara: Toliara town                                                                 | leaf gland exudate | leaf gland exudate    |                        | 0              | 0     | 0      | 100           | 0              |
| drouhardii            | Olson     | 679A       | Madagascar: Toliara: near Amboasary                                                               | leaf               | silica gel dried leaf | mature                 | 0              | 0     | 0      | 100           | 0              |
| drouhardii            | Olson     | 679A       | Madagascar: Toliara: near Amboasary                                                               | leaf               | fresh leaf            | expanding              | 0              | 0     | 0      | 100           | 0              |
| hildebrandtii         | Olson     | 2          | USA: Rare Plant Research nursery, Portland, Oregon                                                | leaf               | silica gel dried leaf | mature                 | 0              | 0     | 0      | 98.6          | 1.3            |
| hildebrandtii         | Olson     | 5709       | USA: California: The Huntington                                                                   | leaf               | fresh leaf            | expanding              | 0              | 0     | 0      | 100           | 0              |
| hildebrandtii         | Olson     | 5709       | USA: California: The Huntington                                                                   | leaf               | fresh leaf            | mature                 | 0              | 0     | 0      | 100           | 0              |
| hildebrandtii         | Olson     | E          | USA: Arid Lands nursery, Tucson, Arizona                                                          | leaf               | fresh leaf            | mature                 | 0              | 0     | 0      | 100           | 0              |
| hildebrandtii         | Olson     | E          | USA: Arid Lands nursery, Tucson, Arizona                                                          | leaf               | fresh leaf            | post-primordic         | 0              | 0     | 0      | 100           | 0              |
| hildebrandtii         | Olson     | E          | USA: Arid Lands nursery, Tucson, Arizona                                                          | leaf               | silica gel dried leaf | mature                 | 0              | 0     | 0      | 98.5          | 1.5            |
| longituba             | Horwood   | s.n.       | (former) Somalia: Las Anod                                                                        | leaf               | silica gel dried leaf | mature                 | 0              | 100   | 0      | 0             | 0              |
| longituba             | IMGC      | 36         | Puntland: plant provided by Ernst Specks, locality unknown                                        | leaf gland exudate | leaf gland exudate    |                        | 0              | 100   | 0      | 0             | 0              |
| longituba             | IMGC      | 36         | Puntland: plant provided by Ernst Specks, locality unknown                                        | seed               | seed                  |                        | 0              | 100   | 0      | 0             | 0              |
| longituba             | Olson     | 1          | Ethiopia: cultivated plant from Out of Africa nursery                                             | leaf               | silica gel dried leaf | mature                 | 0              | 100   | 0      | 0             | 0              |
| longituba             | Olson     | 704        | Kenya: Ca. 13 km WNW of Mandera town on road skirting south bank of the Dawa River, near t        | leaf               | silica gel dried leaf | mature                 | 0              | 100   | 0      | 0             | 0              |
| longituba             | Olson     | 704        | Kenya: former Northeastern Province: Mandera District: c. 20 km WNW of Mandera near locality      | leaf               | fresh leaf            | expanding              | 0              | 78    | 0      | 0             | 22             |
| longituba             | Olson     | 704        | Kenya: former Northeastern Province: Mandera District: c. 20 km WNW of Mandera near locality      | leaf               | fresh leaf            | mature                 | 0              | 75.5  | 0      | 0             | 24.5           |
| longituba             | Olson     | 709        | Kenya: Wajir: Lafaley village 8 km N of Wajir                                                     | leaf               | silica gel dried leaf | mature                 | 0              | 100   | 0      | 0             | 0              |
| longituba             | Olson     | 712        | Kenya: Wajir: 20-35 km E of Wajir on road to Wajir Bor                                            | leaf               | silica gel dried leaf | mature                 | 0              | 100   | 0      | 0             | 0              |
| longituba             | Olson     | 710a       | Kenya: Wajir: 20-35 km E of Wajir on road to Wajir Bor                                            | leaf               | silica gel dried leaf | mature                 | 0              | 100   | 0      | 0             | 0              |
| longituba             | Olson     | 710a       | Kenya: Wajir: 20-35 km E of Wajir on road to Wajir Bor                                            | bark               | silica gel dried bark |                        | 0              | 95.7  | 0      | 4.3           | 0              |
| oleifera (dome Fahey) |           | 2          | India: Tamil Nadu: Purchased from Horti Nurseries                                                 | leaf               | silica gel dried leaf | mature                 | 0              | 0     | 0      | 99.3          | 0.7            |
| oleifera (dome Fahey) |           | 3          | US Virgin Islands: St Croix                                                                       | seed               | seed                  |                        | 0              | 0     | 0      | 99.4          | 0.6            |
| oleifera (dome Fahey) |           | 4          | France: Aigues-Vives: purchased from B&T World Seeds                                              | seed               | seed                  |                        | 29.4           | 0     | 0      | 3.3           | 67.4           |
| oleifera (dome Fahey) |           | 5          | India: Tamil Nadu: Purchased from Horti Nurseries                                                 | seed               | seed                  |                        | 0              | 0     | 0      | 99.3          | 0.7            |
| oleifera (dome Fahey) |           | 6          | USA: Florida: Purchased from Educational Concerns for Hunger Organization, Fort Myers             | seed               | seed                  |                        | 0.7            | 0     | 0      | 98.9          | 0.4            |
| oleifera (dome IMGC)  |           | 1          | Madagascar: Anosy: Tolagnaro                                                                      | leaf               | silica gel dried leaf | mature                 | 0              | 0     | 0      | 99.9          | 0.1            |
| oleifera (dome IMGC)  |           | 2          | Mexico: Yucatán: Mérida                                                                           | leaf               | silica gel dried leaf | mature                 | 0              | 0     | 0      | 99.9          | 0.2            |
| oleifera (dome IMGC)  |           | 4          | Kenya: former Eastern Province: Isiolo                                                            | leaf               | silica gel dried leaf | mature                 | 0              | 0     | 0      | 99.8          | 0.2            |
| oleifera (dome IMGC)  |           | 6          | Thailand: purchased from Superfoods Moringa for Life as PKM cultivar, but has short fruits, unlik | leaf               | silica gel dried leaf | mature                 | 0              | 0     | 0      | 99.9          | 0.2            |
| oleifera (dome IMGC)  |           | 9          | Kenya: former Eastern Province: Isiolo                                                            | leaf               | silica gel dried leaf | mature                 | 0              | 0     | 0      | 94.9          | 5.1            |
| oleifera (dome IMGC)  |           | 13         | Kenya: former Eastern Province: Isiolo                                                            | leaf               | silica gel dried leaf | mature                 | 0              | 0     | 0      | 86.6          | 13.4           |
| oleifera (dome IMGC)  |           | 52         | Kenya: former Coast Province: Voi town                                                            | leaf               | silica gel dried leaf | mature                 | 0              | 0     | 0      | 99.1          | 0.9            |
| oleifera (dome IMGC)  |           | 66         | India: Tamil Nadu: Chennai: Chrompet area                                                         | leaf               | silica gel dried leaf | mature                 | 0.8            | 0     | 0      | 98.4          | 0.9            |
| oleifera (dome IMGC)  |           | 81         | USA: New Mexico: grown from seed from Mesa Garden nursery, provenance unknown                     | leaf               | silica gel dried leaf | mature                 | 0.8            | 0     | 0      | 98.6          | 0.6            |
| oleifera (dome IMGC)  |           | 82         | France: La Réunion: grown from seed from Le Jardin Naturel nursery                                | leaf               | silica gel dried leaf | mature                 | 0.8            | 0     | 0      | 99            | 0.2            |
| oleifera (dome IMGC)  |           | 85         | Germany: Erzhausen: grown from seed from G. Kohres nursery, provenance unknown                    | leaf               | silica gel dried leaf | mature                 | 0.5            | 0     | 0      | 98.8          | 0.7            |

|                        |       |                                                                                                  |                    |                       |                |      |   |      |       |      |
|------------------------|-------|--------------------------------------------------------------------------------------------------|--------------------|-----------------------|----------------|------|---|------|-------|------|
| oleifera (dome IMGC    | 183   | India: Tamil Nadu: Chennai area: PKM type cultivar (collected by V. Amalan Stanley July 1998)    | leaf               | silica gel dried leaf | mature         | 0.8  | 0 | 0    | 99    | 0.3  |
| oleifera (dome IMGC    | 248   | India: Uttarakhand: Purchased from Paritosh Herbals Nursery, Dehra Dun                           | leaf               | silica gel dried leaf | mature         | 0.9  | 0 | 0    | 98.5  | 0.6  |
| oleifera (dome IMGC    | 249   | India: Uttarakhand: Purchased from Paritosh Herbals Nursery, Dehra Dun                           | leaf               | silica gel dried leaf | mature         | 0.6  | 0 | 0    | 97.5  | 2    |
| oleifera (dome IMGC    | 257   | Mexico: Michoacán: Nueva Italia                                                                  | leaf               | silica gel dried leaf | mature         | 0.5  | 0 | 0    | 99.1  | 0.4  |
| oleifera (dome IMGC    | 288   | India: Uttarakhand: Purchased from Paritosh Herbals Nursery, Dehra Dun                           | leaf               | silica gel dried leaf | mature         | 0    | 0 | 0    | 94.2  | 5.8  |
| oleifera (dome IMGC    | 289   | India: Uttarakhand: Purchased from Paritosh Herbals Nursery, Dehra Dun                           | leaf               | silica gel dried leaf | mature         | 0    | 0 | 0    | 100   | 0    |
| oleifera (dome IMGC    | 299   | Mexico: Jalisco: Miguel Hidalgo Nuevo                                                            | leaf               | silica gel dried leaf | mature         | 0.2  | 0 | 0    | 99.1  | 0.65 |
| oleifera (dome IMGC    | 324   | South Africa: grown from seed from Silverhill Seeds, Cape Town, South Africa                     | leaf               | silica gel dried leaf | mature         | 0    | 0 | 0    | 100.1 | 0    |
| oleifera (dome IMGC    | 362   | Philippines: Batangas: Mabini town                                                               | leaf               | silica gel dried leaf | mature         | 0    | 0 | 0    | 99.2  | 0.9  |
| oleifera (dome IMGC    | 363   | Philippines: Batangas: Batangas town                                                             | leaf               | silica gel dried leaf | mature         | 0    | 0 | 0    | 99.7  | 0.3  |
| oleifera (dome Olson   | s.n.1 | India: Tamil Nadu: Chennai area: PKM type cultivar (collected by V. Amalan Stanley July 1998)    | leaf               | silica gel dried leaf | mature         | 0    | 0 | 0    | 99.5  | 0.5  |
| oleifera (dome Olson   | s.n.2 | India: Tamil Nadu: Chennai area: PKM type cultivar (collected by V. Amalan Stanley July 1998)    | leaf               | fresh leaf            | post-primordic | 0    | 0 | 0    | 100   | 0    |
| oleifera (dome Stanley | s.n.1 | India: Tamil Nadu: Chennai area: Chrompet area                                                   | leaf               | fresh leaf            | expanding      | 0    | 0 | 0    | 100   | 0    |
| oleifera (dome Stanley | s.n.2 | India: Tamil Nadu: Chennai: Chrompet area                                                        | leaf               | fresh leaf            | mature         | 0    | 0 | 0    | 100   | 0    |
| oleifera (dome Stanley | s.n.3 | India: Tamil Nadu: Chennai: Chrompet area                                                        | leaf               | silica gel dried leaf | mature         | 0    | 0 | 0    | 99.1  | 0.9  |
| oleifera (wild t IMGC  | 17    | Pakistan: Punjab: Qila Didar Singh                                                               | leaf               | silica gel dried leaf | mature         | 43.9 | 0 | 0    | 0.8   | 55.4 |
| oleifera (wild t IMGC  | 27    | Pakistan: Sindh: Khair Pur                                                                       | leaf               | silica gel dried leaf | mature         | 0    | 0 | 0    | 8.3   | 91.7 |
| oleifera (wild t IMGC  | 57    | Pakistan: Sindh: Khair Pur                                                                       | leaf               | silica gel dried leaf | mature         | 0.2  | 0 | 0    | 38.5  | 61.3 |
| oleifera (wild t IMGC  | 61    | Pakistan: Punjab: Qila Didar Singh                                                               | leaf               | silica gel dried leaf | mature         | 22.1 | 0 | 0    | 2.6   | 75.3 |
| oleifera (wild t IMGC  | 85    | Germany: Erzhausen: grown from seed from G. Kohres nursery, provenance unknown                   | leaf               | silica gel dried leaf | mature         | 0.8  | 0 | 0    | 98.6  | 0.7  |
| oleifera (wild t IMGC  | 140   | India: Chandigarh: purchased from Shankar Nursery, June 2000                                     | leaf               | silica gel dried leaf | mature         | 0    | 0 | 0    | 1.1   | 98.9 |
| oleifera (wild t IMGC  | 141   | India: Chandigarh: purchased from Shankar Nursery, June 2000                                     | leaf               | silica gel dried leaf | mature         | 6.8  | 0 | 0    | 0.3   | 92.9 |
| oleifera (wild t IMGC  | 142   | India: Chandigarh: purchased from Shankar Nursery, June 2001                                     | leaf               | silica gel dried leaf | mature         | 8.4  | 0 | 0    | 6.1   | 85.5 |
| oleifera (wild t IMGC  | 143   | India: Chandigarh: purchased from Shankar Nursery, June 2000                                     | leaf               | silica gel dried leaf | mature         | 50.8 | 0 | 0    | 15.9  | 33.3 |
| oleifera (wild t IMGC  | 152   | India: Chandigarh: purchased from Shankar Nursery, June 2000                                     | leaf               | silica gel dried leaf | mature         | 0    | 0 | 0    | 95.4  | 4.6  |
| oleifera (wild t IMGC  | 171   | Pakistan: Punjab: Qila Didar Singh                                                               | leaf               | silica gel dried leaf | mature         | 11.7 | 0 | 0    | 41.5  | 46.9 |
| oleifera (wild t IMGC  | 192   | Pakistan: Sindh: Khair Pur                                                                       | leaf               | silica gel dried leaf | mature         | 0.1  | 0 | 0    | 95.5  | 3.5  |
| oleifera (wild t IMGC  | 255   | India: Chandigarh: purchased from Shankar Nursery, June 2000                                     | leaf               | silica gel dried leaf | mature         | 0.7  | 0 | 0    | 98.2  | 1.1  |
| oleifera (wild t IMGC  | 256   | India: Chandigarh: purchased from Shankar Nursery, June 2000                                     | leaf               | silica gel dried leaf | mature         | 14.7 | 0 | 0    | 32.9  | 52.4 |
| oleifera (wild t IMGC  | 279   | India: Chandigarh: purchased from Shankar Nursery, June 2000                                     | leaf               | silica gel dried leaf | mature         | 11.2 | 0 | 0    | 21.9  | 66.9 |
| oleifera (wild t Olson | 5661  | India: Chandigarh: purchased from Shankar Nursery, June 2000                                     | seed               | seed                  |                | 37.2 | 0 | 0    | 0.8   | 62   |
| oleifera x conc IMGC   | 11    | Mexico: Jalisco: hybrid produced at IMGC                                                         | leaf               | silica gel dried leaf | mature         | 0.6  | 0 | 0    | 98    | 1.5  |
| oleifera x conc IMGC   | 22    | Mexico: Jalisco: hybrid produced at IMGC                                                         | leaf               | silica gel dried leaf | mature         | 0.9  | 0 | 0    | 71.8  | 27.3 |
| oleifera x conc IMGC   | 23    | India: Tamil Nadu: Pachalur area (collected by S. Kalaiselvi, July 2001)                         | leaf               | silica gel dried leaf | mature         | 0    | 0 | 0    | 98.7  | 1.3  |
| oleifera x conc IMGC   | 65    | Mexico: Jalisco: hybrid produced at IMGC                                                         | leaf               | silica gel dried leaf | mature         | 0.6  | 0 | 0    | 69.4  | 30   |
| ovalifolia Olson       | 716   | Namibia: Namib-Naukluft Park: W of Kuiseb Pass                                                   | leaf               | fresh leaf            | mature         | 16.9 | 0 | 0    | 9.8   | 73.3 |
| ovalifolia Olson       | 718   | Namibia: Namib-Naukluft Park: W of Kuiseb Pass                                                   | leaf               | fresh leaf            | mature         | 0    | 0 | 0    | 17.4  | 82.6 |
| ovalifolia Olson       | 5710  | Namibia: Erongo: Karibib                                                                         | leaf               | silica gel dried leaf | mature         | 0    | 0 | 0    | 44.8  | 55.2 |
| ovalifolia Olson       | 5710  | Namibia: Erongo: Karibib                                                                         | leaf               | fresh leaf            | mature         | 0    | 0 | 0    | 76.1  | 24.0 |
| ovalifolia Olson       | 5711  | Namibia: Erongo: Karibib                                                                         | leaf               | fresh leaf            | post-primordic | 0    | 0 | 0    | 42.7  | 57.3 |
| ovalifolia Olson       | 5711  | Namibia: Erongo: Karibib                                                                         | leaf               | fresh leaf            | mature         | 0    | 0 | 0    | 47.7  | 52.3 |
| ovalifolia Olson       | 5712  | Namibia: National Botanical Research Institute                                                   | seed               | seed                  |                | 0    | 0 | 0    | 76.2  | 23.9 |
| peregrina Danin        | s.n.  | Israel: Southern Region: En-Gedi                                                                 | leaf               | silica gel dried leaf | mature         | 2.1  | 0 | 0    | 94.7  | 3.1  |
| peregrina Danin        | s.n.  | Israel: Southern Region: En-Gedi                                                                 | leaf               | fresh leaf            | expanding      | 0    | 0 | 0    | 99.2  | 0.8  |
| peregrina Danin        | s.n.  | Israel: Southern Region: En-Gedi                                                                 | leaf               | fresh leaf            | post-primordic | 0    | 0 | 0    | 78.3  | 21.7 |
| peregrina Danin        | s.n.  | Israel: Southern Region: En-Gedi                                                                 | seed               | seed                  |                | 0    | 0 | 0    | 91.3  | 8.7  |
| peregrina Olson        | 566   | Oman: Muscat: Sultan Qaboos University                                                           | leaf               | silica gel dried leaf | mature         | 37.8 | 0 | 0    | 60.4  | 1.9  |
| peregrina Olson        | 567   | Oman: northern region: Wadi Muaydin 2-3 km N of Birkat Al Mawz                                   | seed               | seed                  |                | 9.6  | 0 | 0    | 88    | 2.4  |
| peregrina Olson        | 568   | Oman: ad-Dahiliyah: Wadi Ghul                                                                    | leaf               | silica gel dried leaf | mature         | 2.6  | 0 | 0    | 95.3  | 2.1  |
| peregrina Olson        | 568   | Oman: ad-Dahiliyah: Wadi Ghul                                                                    | leaf               | fresh leaf            | mature         | 7    | 0 | 0    | 93    | 0    |
| peregrina Olson        | s.n.1 | Egypt: grown from seeds purchased in Cairo market, provided by Ben Stern, University of Bradford | leaf               | silica gel dried leaf | mature         | 0    | 0 | 0    | 98.5  | 1.5  |
| peregrina Olson        | s.n.2 | Egypt: grown from seeds purchased in Cairo market, provided by Ben Stern, University of Bradford | leaf               | fresh leaf            | mature         | 22   | 0 | 0    | 78    | 0    |
| peregrina Olson        | s.n.3 | Egypt: grown from seeds purchased in Cairo market, provided by Ben Stern, University of Bradford | leaf gland exudate | leaf gland exudate    |                | 0    | 0 | 0    | 100   | 0    |
| riuae Olson            | 677   | Kenya: Marsabit District: E slope of Mount Baio                                                  | leaf               | silica gel dried leaf | mature         | 36   | 0 | 0    | 54.6  | 9.5  |
| riuae Olson            | 701   | Kenya: Marsabit District: E slope of Mount Baio                                                  | seed               | seed                  |                | 0.5  | 0 | 0    | 52.2  | 47.4 |
| riuae Olson            | 701   | Kenya: Rhamu District: W of Rhamu town                                                           | leaf               | silica gel dried leaf | mature         | 0    | 0 | 0    | 2.3   | 97.8 |
| riuae Samana           | 1     | Kenya: Marsabit District: E slope of Mount Baio                                                  | seed               | seed                  |                | 0.6  | 0 | 0    | 88.6  | 10.8 |
| riuae Samana           | 2     | Kenya: Marsabit District: locality known as "Soit"; collected by J. Samana 2000                  | leaf               | fresh leaf            | post-primordic | 0    | 0 | 33.9 | 9.5   | 56.7 |
| riuae Samana           | 3     | Kenya: Marsabit District: locality known as "Soit"; collected by J. Samana 2000                  | leaf               | fresh leaf            | post-primordic | 0    | 0 | 35.7 | 13.4  | 50.9 |
| riuae Samana           | 4     | Kenya: Marsabit District: locality known as "Soit"; collected by J. Samana 2000                  | leaf               | fresh leaf            | post-primordic | 0    | 0 | 35.8 | 3.4   | 60.8 |
| riuae Samana           | 5     | Kenya: Marsabit District: locality known as "Soit"; collected by J. Samana 2000                  | leaf               | fresh leaf            | post-primordic | 0    | 0 | 44   | 9.6   | 46.5 |
| ruspoliana Olson       | 702   | Kenya: Mandera District: Near "Border Point One" (the Kenya-Ethiopia-Somalia border point), at   | leaf               | fresh leaf            | mature         | 0    | 0 | 0    | 99.3  | 0.7  |
| ruspoliana Olson       | 702   | Kenya: Rhamu-Dimtu Division, around town of Yabicho, ca. 6.5 km by road WNW of Rhamu.            | leaf               | silica gel dried leaf | mature         | 44.9 | 0 | 0    | 54.6  | 0.5  |

|             |       |                                                                                                        |                       |                       |      |   |   |       |      |
|-------------|-------|--------------------------------------------------------------------------------------------------------|-----------------------|-----------------------|------|---|---|-------|------|
| ruspoliana  | Olson | 703 Kenya: Mander District: Near "Border Point One" (the Kenya-Ethiopia-Somalia border point), at leaf | fresh leaf            | mature                | 12.6 | 0 | 0 | 87.5  | 0    |
| ruspoliana  | Olson | 703 Kenya: Mander District: Near "Border Point One" (the Kenya-Ethiopia-Somalia border point), at leaf | silica gel dried leaf | mature                | 44.3 | 0 | 0 | 55.3  | 0.5  |
| ruspoliana  | Olson | 703 Kenya: Mander District: Near "Border Point One" (the Kenya-Ethiopia-Somalia border point), at leaf | fresh leaf            | expanding             | 5.3  | 0 | 0 | 93.6  | 1.1  |
| ruspoliana  | Olson | 705 Kenya: Mander District: Khalaliyo Division, Ca. 20 km WNW of Mander town on road skirting s leaf   | silica gel dried leaf | expanding             | 0    | 0 | 0 | 61.8  | 38.2 |
| stenopetala | Olson | 675 Kenya: Rift Valley Province: Baringo District: Parmalok Island, Lake Baringo                       | leaf                  | silica gel dried leaf | 0    | 0 | 0 | 97.4  | 2.6  |
| stenopetala | Olson | 675 Kenya: Rift Valley Province: Baringo District: Parmalok Island, Lake Baringo                       | leaf                  | fresh leaf            | 0    | 0 | 0 | 100.1 | 0    |
| stenopetala | Olson | 675 Kenya: Rift Valley Province: Baringo District: Parmalok Island, Lake Baringo                       | leaf                  | fresh leaf            | 0    | 0 | 0 | 100   | 0    |
| stenopetala | Olson | 675 Kenya: Rift Valley Province: Baringo District: Parmalok Island, Lake Baringo                       | leaf gland exudate    | leaf gland exudate    | 0    | 0 | 0 | 100   | 0    |
| stenopetala | Olson | 675 Kenya: Rift Valley Province: Baringo District: Parmalok Island, Lake Baringo                       | seed                  | seed                  | 0    | 0 | 0 | 99    | 1    |
